# Supplementary material for: Donor-acceptor substituted phenylethynyltriphenylenes – excited state intramolecular charge transfer, solvatochromic absorption and fluorescence emission
Source: PubMed Central journal article supplement (PMC2981938; doi:10.3762/bjoc.6.112), 2010-10-18
Supplement: Beilstein_J_Org_Chem-06-992-s001.pdf [file Beilstein_J_Org_Chem-06-992-s001.pdf]

## Supporting Information

for

# **Donor-acceptor substituted phenylethynyltriphenylenes – excited state intramolecular charge transfer, solvatochromic absorption and fluorescence emission**

Ritesh Nandy and Sethuraman Sankararaman\*

Address: Department of Chemistry, Indian Institute of Technology Madras, Chennai 600036,  
India

Email: Sethuraman Sankararaman – [sanka@iitm.ac.in](mailto:sanka@iitm.ac.in)

\* Corresponding author

Experimental data for compounds **1a–g** and **2–4**

| <b>Contents</b>                                                                                                            | <b>Page No</b> |
|----------------------------------------------------------------------------------------------------------------------------|----------------|
| Synthesis of 2-iodotriphenylene.                                                                                           | S4             |
| <b>Table 1:</b> Absorption spectral data for <b>1a-g</b> in various solvents.                                              | S5             |
| CV measurements.                                                                                                           | S6             |
| <b>Figure 1:</b> <sup>1</sup> H NMR spectrum of <b>1a</b> in CDCl <sub>3</sub> .                                           | S7             |
| <b>Figure 2:</b> Expanded aromatic region of <sup>1</sup> H NMR spectrum of <b>1a</b> in CDCl <sub>3</sub> .               | S8             |
| <b>Figure 3:</b> <sup>13</sup> C NMR spectrum of <b>1a</b> in CDCl <sub>3</sub> .                                          | S9             |
| <b>Figure 4:</b> Expanded aromatic region of <sup>13</sup> C NMR spectrum of <b>1a</b> in CDCl <sub>3</sub> .              | S10            |
| <b>Figure 5:</b> <sup>1</sup> H NMR spectrum of <b>1b</b> in CDCl <sub>3</sub> .                                           | S11            |
| <b>Figure 6:</b> Expanded aromatic region of <sup>1</sup> H NMR spectrum of <b>1b</b> in CDCl <sub>3</sub> .               | S12            |
| <b>Figure 7:</b> <sup>13</sup> C NMR spectrum of <b>1b</b> in CDCl <sub>3</sub> .                                          | S13            |
| <b>Figure 8.</b> Expanded aromatic region of <sup>13</sup> C NMR spectrum of <b>1b</b> in CDCl <sub>3</sub> .              | S14            |
| <b>Figure 9.</b> <sup>1</sup> H NMR spectrum of <b>1c</b> in CDCl <sub>3</sub> .                                           | S15            |
| <b>Figure 10.</b> Expanded aromatic region of <sup>1</sup> H NMR spectrum of <b>1c</b> in CDCl <sub>3</sub> .              | S16            |
| <b>Figure 11.</b> <sup>13</sup> C NMR spectrum of <b>1c</b> in CDCl <sub>3</sub> .                                         | S17            |
| <b>Figure 12.</b> <sup>1</sup> H NMR spectrum of <b>1d</b> in CDCl <sub>3</sub> .                                          | S18            |
| <b>Figure 13.</b> Expanded aromatic region of <sup>1</sup> H NMR spectrum of <b>1d</b> in CDCl <sub>3</sub> .              | S19            |
| <b>Figure 14.</b> <sup>13</sup> C NMR spectrum of <b>1d</b> in CDCl <sub>3</sub> .                                         | S20            |
| <b>Figure 15.</b> <sup>1</sup> H NMR spectrum of <b>1e</b> in CDCl <sub>3</sub> .                                          | S21            |
| <b>Figure 16.</b> Expanded aromatic region of <sup>1</sup> H NMR spectrum of <b>1e</b> in CDCl <sub>3</sub> .              | S22            |
| <b>Figure 17.</b> <sup>13</sup> C NMR spectrum of <b>1e</b> in CDCl <sub>3</sub> .                                         | S23            |
| <b>Figure 18.</b> <sup>1</sup> H NMR spectrum of <b>1f</b> in CDCl <sub>3</sub> .                                          | S24            |
| <b>Figure 19.</b> Expanded aromatic / aliphatic regions of <sup>1</sup> H NMR spectrum of <b>1f</b> in CDCl <sub>3</sub> . | S25            |
| <b>Figure 20.</b> <sup>13</sup> C NMR spectrum of <b>1f</b> in CDCl <sub>3</sub> .                                         | S26            |
| <b>Figure 21.</b> <sup>1</sup> H NMR spectrum of <b>1g</b> in CDCl <sub>3</sub> .                                          | S27            |
| <b>Figure 22.</b> Expanded aromatic region of <sup>1</sup> H NMR spectrum of <b>1g</b> in CDCl <sub>3</sub> .              | S28            |
| <b>Figure 23.</b> <sup>13</sup> C NMR spectrum of <b>1g</b> in CDCl <sub>3</sub> .                                         | S29            |
| <b>Figure 24.</b> <sup>1</sup> H NMR spectrum of <b>2</b> in CDCl <sub>3</sub> .                                           | S30            |
| <b>Figure 25.</b> Expanded aromatic region of <sup>1</sup> H NMR spectrum of <b>2</b> in CDCl <sub>3</sub> .               | S31            |
| <b>Figure 26.</b> <sup>13</sup> C NMR spectrum of <b>2</b> in CDCl <sub>3</sub> .                                          | S32            |
| <b>Figure 27.</b> Expanded aromatic region of <sup>13</sup> C NMR spectrum of <b>2</b> in CDCl <sub>3</sub> .              | S33            |

|                                                                                                          |     |
|----------------------------------------------------------------------------------------------------------|-----|
| <b>Figure 28.</b> $^1\text{H}$ NMR spectrum of <b>3</b> in $\text{CDCl}_3$ .                             | S34 |
| <b>Figure 29.</b> Expanded aromatic region of $^1\text{H}$ NMR spectrum of <b>3</b> in $\text{CDCl}_3$ . | S35 |
| <b>Figure 30.</b> $^{13}\text{C}$ NMR spectrum of <b>3</b> in $\text{CDCl}_3$ .                          | S36 |
| <b>Figure 31.</b> $^1\text{H}$ NMR spectrum of <b>4</b> in $\text{CDCl}_3$ .                             | S37 |
| <b>Figure 32.</b> Expanded aromatic region of $^1\text{H}$ NMR spectrum of <b>4</b> in $\text{CDCl}_3$ . | S38 |
| <b>Figure 33.</b> $^{13}\text{C}$ NMR spectrum of <b>4</b> in $\text{CDCl}_3$ .                          | S39 |
| DFT calculation based atomic coordinates for <b>1c</b> and <b>1g</b>                                     | S40 |
| <b>Figure 34.</b> Lippert-Mataga plot for <b>1d</b>                                                      | S43 |
| <b>Figure 35.</b> Lippert-Mataga plot for <b>1f</b>                                                      | S43 |

**2-iodotriphenylene (2):** To a suspension of triphenylene (0.300 g, 1.3 mmol) in acetic acid (50 mL), water (5 mL) and sulfuric acid (0.5 mL), was added iodine (0.200 g, 0.8 mmol) and potassium iodate (0.068 g, 0.3 mmol) (This iodination procedure has been reported earlier for pyrene, Leroy-Lhez, S.; Fages, F. *Eur. J. Org. Chem.*, **2005**, 2684–2688). The reaction mixture was heated at 55 °C for 1 day, then cooled to room temperature and poured into water (100 mL). The mixture was extracted with DCM (100 mL) and the organic layer was washed successively with sodium thiosulfate solution (2 x 50 mL) and water (100 mL), dried over anhydrous sodium sulfate and the solvent was removed under reduced pressure to give a pale brown solid. The solid was purified by column chromatography on silica gel with hexane as eluant to give an inseparable mixture of 2-iodotriphenylene and triphenylene as a white solid (0.36 g) (45:55 by <sup>1</sup>H NMR). The mixture was used as such in all further reactions. A small amount of pure 2-iodotriphenylene (**2**) was separated for characterization. <sup>1</sup>H NMR (CDCl<sub>3</sub>, 400MHz): δ 8.93 (d, *J* = 1.6 Hz, 1H), 8.51-8.63 (m, 4H), 8.31 (d, *J* = 8.4 Hz, 1H), 7.89 (dd, *J* = 1.6, 8.4 Hz, 1H), 7.62-7.69 (m, 4H) ppm. <sup>13</sup>C NMR (CDCl<sub>3</sub>, 100MHz): δ 135.79, 132.48, 131.75, 129.99, 129.79, 129.16, 129.06, 128.37, 127.81, 127.69, 127.42, 127.39, 125.03, 123.37, 123.33, 123.30, 123.07, 93.31 ppm. MALDI-TOF MS: *m/z* (%) 354 (100) [M<sup>+</sup>], 355 (58) [M<sup>+</sup> + 1], 356 (10) [M<sup>+</sup> + 2]. An attempt to convert all of the triphenylene to 2-iodotriphenylene by using an excess of iodinating agent and a higher temperature gave a complex mixture of polyiodotriphenylenes. The above procedure is optimized to give a mixture of only monoiodotriphenylene and unreacted triphenylene. The presence of triphenylene did not cause any problem in the subsequent cross coupling reactions of this mixture and triphenylene could be easily separated by chromatography after the cross coupling reactions.

**Quantum yield of fluorescence ( $\Phi_f$ ):** Fluorescence quantum yields were measured after degassing the samples thoroughly by purging the solutions with nitrogen prior to measurement. Quinine sulfate was used as the standard ( $\lambda_{ex} = 355$  nm,  $\Phi_f = 0.57$  in 0.1 M H<sub>2</sub>SO<sub>4</sub>). Appropriate corrections were made for the optical density of the solutions and the refractive index of the medium [1].

**Table 1:** Absorption spectral data for **1a-g** in various solvents.Compound **1a**.

| Solvent         | $\lambda_{\max}$ (log $\epsilon$ ) nm |
|-----------------|---------------------------------------|
| Cyclohexane     | 274 (4.82), 314 (4.58), 332 (4.53)    |
| Benzene         | 276 (4.87), 318 (4.59), 334 (4.52)    |
| Dichloromethane | 274 (4.79), 317 (4.56), 333 (4.52)    |
| 2-Propanol      | 271 (4.88), 313 (4.64), 330 (4.59)    |
| Acetonitrile    | 271 (4.69), 314 (4.47), 330 (4.44)    |
| DMSO            | 274 (4.88), 318 (4.64), 335 (4.59)    |

Compound **1b**.

| Solvent         | $\lambda_{\max}$ (log $\epsilon$ ) nm              |
|-----------------|----------------------------------------------------|
| Cyclohexane     | 274 (4.81), 307 (sh, 4.53), 318 (4.58), 334 (4.54) |
| Benzene         | 275 (4.83), 308 (sh, 4.50), 321 (4.54), 336 (4.48) |
| Dichloromethane | 275 (4.86), 309 (sh, 4.60), 319 (4.63), 334 (4.59) |
| 2-Propanol      | 271 (4.85), 307 (sh, 4.59), 318 (4.61), 332 (4.56) |
| Acetonitrile    | 273 (4.75), 308 (sh, 4.51), 316 (4.52), 331 (4.50) |
| DMSO            | 275 (4.84), 310 (sh, 4.57), 322 (4.60), 337 (4.56) |

Compound **1c**.

| Solvent         | $\lambda_{\max}$ (log $\epsilon$ ) nm                                          |
|-----------------|--------------------------------------------------------------------------------|
| Cyclohexane     | 255 (4.67), 272 (4.69), 285 (sh, 4.62), 310 (sh, 4.44), 328 (4.58), 348 (4.55) |
| Benzene         | 276 (4.75), 289 (sh, 4.61), 311 (sh, 4.39), 331 (4.52), 350 (4.45)             |
| Dichloromethane | 256 (4.58), 273 (4.58), 286 (sh, 4.53), 311 (sh, 4.36), 330 (4.49), 347 (4.45) |
| 2-Propanol      | 255 (4.61), 270 (4.60), 286 (sh, 4.49), 310 (sh, 4.38), 328 (4.49), 344 (4.45) |
| Ethanol         | 255 (4.63), 271 (4.63), 285 (sh, 4.47), 310 (sh, 4.41), 327 (4.52), 344 (4.48) |
| Acetonitrile    | 255 (4.66), 270 (4.66), 284 (sh, 4.62), 309 (sh, 4.47), 326 (4.58), 342 (4.54) |
| DMSO            | 258 (4.68), 274 (4.65), 288 (sh, 4.60), 313 (sh, 4.42), 332 (4.54), 349 (4.49) |

Compound **1d**.

| Solvent         | $\lambda_{\max}$ (log $\epsilon$ ) nm                                           |
|-----------------|---------------------------------------------------------------------------------|
| Cyclohexane     | 257 (4.91), 272 (sh, 4.88), 286 (4.84), 311 (sh, 4.68), 330 (4.85), 351 (4.77)  |
| Benzene         | 275 (4.98), 288 (4.92), 313 (sh, 4.74), 334 (4.87), 353 (4.79)                  |
| Dichloromethane | 258 (4.97), 275 (sh, 4.91), 287 (sh, 4.88), 313 (4.73), 333 (4.87), 350 (4.82)  |
| 2-Propanol      | 257 (4.96), 274 (sh, 4.89), 286 (4.86), 311 (sh, 4.71), 332 (4.85), 348 (4.80)  |
| Ethanol         | 257 (4.99), 274 (sh, 4.91), 286 (4.89), 310 (sh, 4.73), 331 (4.87), 346 (4.83)  |
| Acetonitrile    | 256 (4.94), 271 (sh, 4.88), 286 (4.86), 309 (sh, 4.71), 328 (4.85), 345 (4.80)  |
| DMSO            | 259 (4.99), 276 (sh, 4.92), 289 (4.88), 312 (sh, 4.69), 335 (4.83), 352 (4.77). |

Compound **1e**.

| Solvent         | $\lambda_{\max}$ (log $\epsilon$ ) nm                                  |
|-----------------|------------------------------------------------------------------------|
| Cyclohexane     | 256 (4.86), 287 (sh, 4.72), 312 (sh, 4.58), 333 (4.73), 353 (sh, 4.60) |
| Benzene         | 274 (4.75), 289 (sh, 4.71), 314 (sh, 4.54), 337 (4.68), 358 (sh, 4.56) |
| Dichloromethane | 258 (4.83), 287 (sh, 4.68), 312 (sh, 4.52), 335 (4.67), 354 (sh, 4.59) |
| 2-Propanol      | 258 (4.86), 287 (sh, 4.68), 311 (sh, 4.52), 333 (4.66), 353 (sh, 4.59) |
| Ethanol         | 258 (4.88), 287 (sh, 4.71), 310 (sh, 4.55), 333 (4.69), 353 (sh, 4.62) |
| Acetonitrile    | 256 (4.85), 286 (sh, 4.71), 310 (sh, 4.58), 331 (4.71), 350 (sh, 4.62) |
| DMSO            | 262 (4.85), 290 (sh, 4.68), 313 (sh, 4.49), 337 (4.61), 358 (sh, 4.52) |

Compound **1f**.

| Solvent         | $\lambda_{\max}$ (log $\epsilon$ ) nm                                                          |
|-----------------|------------------------------------------------------------------------------------------------|
| Cyclohexane     | 257 (4.58), 269 (4.59), 288 (sh, 4.40), 325 (4.42), 344 (4.34)                                 |
| Benzene         | 276 (4.59), 291 (4.45), 314 (sh, 4.37), 329 (4.49), 346 (4.42)                                 |
| Dichloromethane | 258 (4.59), 271 (4.59), 287 (sh, 4.43), 310 (sh, 4.29), 327 (4.44), 344 (4.39)                 |
| 2-Propanol      | 256 (4.49), 268 (4.52), 288 (sh, 4.32), 309 (sh, 4.21), 324 (4.32), 340 (4.27), 370 (sh, 3.45) |
| Ethanol         | 256 (4.48), 268 (4.50), 286 (sh, 4.33), 308 (sh, 4.22), 324 (4.34), 339 (4.29)                 |
| Acetonitrile    | 256 (4.52), 268 (4.52), 287 (sh, 4.33), 308 (sh, 4.20), 325 (4.34), 341 (4.31), 369 (sh, 3.68) |
| DMSO            | 258 (4.62), 271 (4.60), 289 (sh, 4.42), 314 (sh, 4.25), 330 (4.34), 348 (4.29), 377 (sh, 3.43) |

Compound **1g**.

| Solvent         | $\lambda_{\max}$ (log $\epsilon$ ) nm              |
|-----------------|----------------------------------------------------|
| Cyclohexane     | 259 (4.88), 287 (sh, 4.64), 342 (4.70), 366 (4.67) |
| Benzene         | 276 (4.68), 289 (sh, 4.61), 352 (4.64)             |
| Dichloromethane | 262 (4.80), 290 (sh, 4.54), 357 (4.62)             |
| THF             | 260 (4.87), 289 (sh, 4.60), 355 (4.65)             |
| 2-Propanol      | 259 (4.80), 287 (sh, 4.56), 349 (4.62)             |
| Ethanol         | 259 (4.84), 288 (sh, 4.59), 349 (4.64)             |
| Acetonitrile    | 260 (4.76), 287 (sh, 4.51), 356 (4.59)             |
| DMSO            | 264 (4.88), 292 (sh, 4.54), 366 (4.58)             |

**CV measurements.**

CV of all the compounds was recorded in acetonitrile at 1mM concentration at a scan rate of 0.1 V/s. using tetrabutylammonium tetrafluoroborate (0.1 M ) as the supporting electrolyte, glassy carbon as the working electrode, Pt wire as the counter electrode and SCE as the reference electrode with CH Instrument 660A. The peak potentials are reported with reference to SCE.

**Table 2:** Oxidation and reduction peak potentials of compounds **1a-g**.

| Compound  | $E_{p, ox}$ (V) | $E_{p, red}$ (V)           |
|-----------|-----------------|----------------------------|
| <b>1a</b> | 1.60            | -2.14, -2.25               |
| <b>1b</b> | 1.65            | -2.02, -2.15, -2.42        |
| <b>1c</b> | 1.68            | -1.85, -2.03, -2.43, -2.55 |
| <b>1d</b> | 1.66            | -1.72, -1.85, -2.09        |
| <b>1e</b> | 1.63            | -1.63, -1.84, -2.18, -2.53 |
| <b>1g</b> | 0.76, 1.64      | -2.27, -2.36, -2.53        |

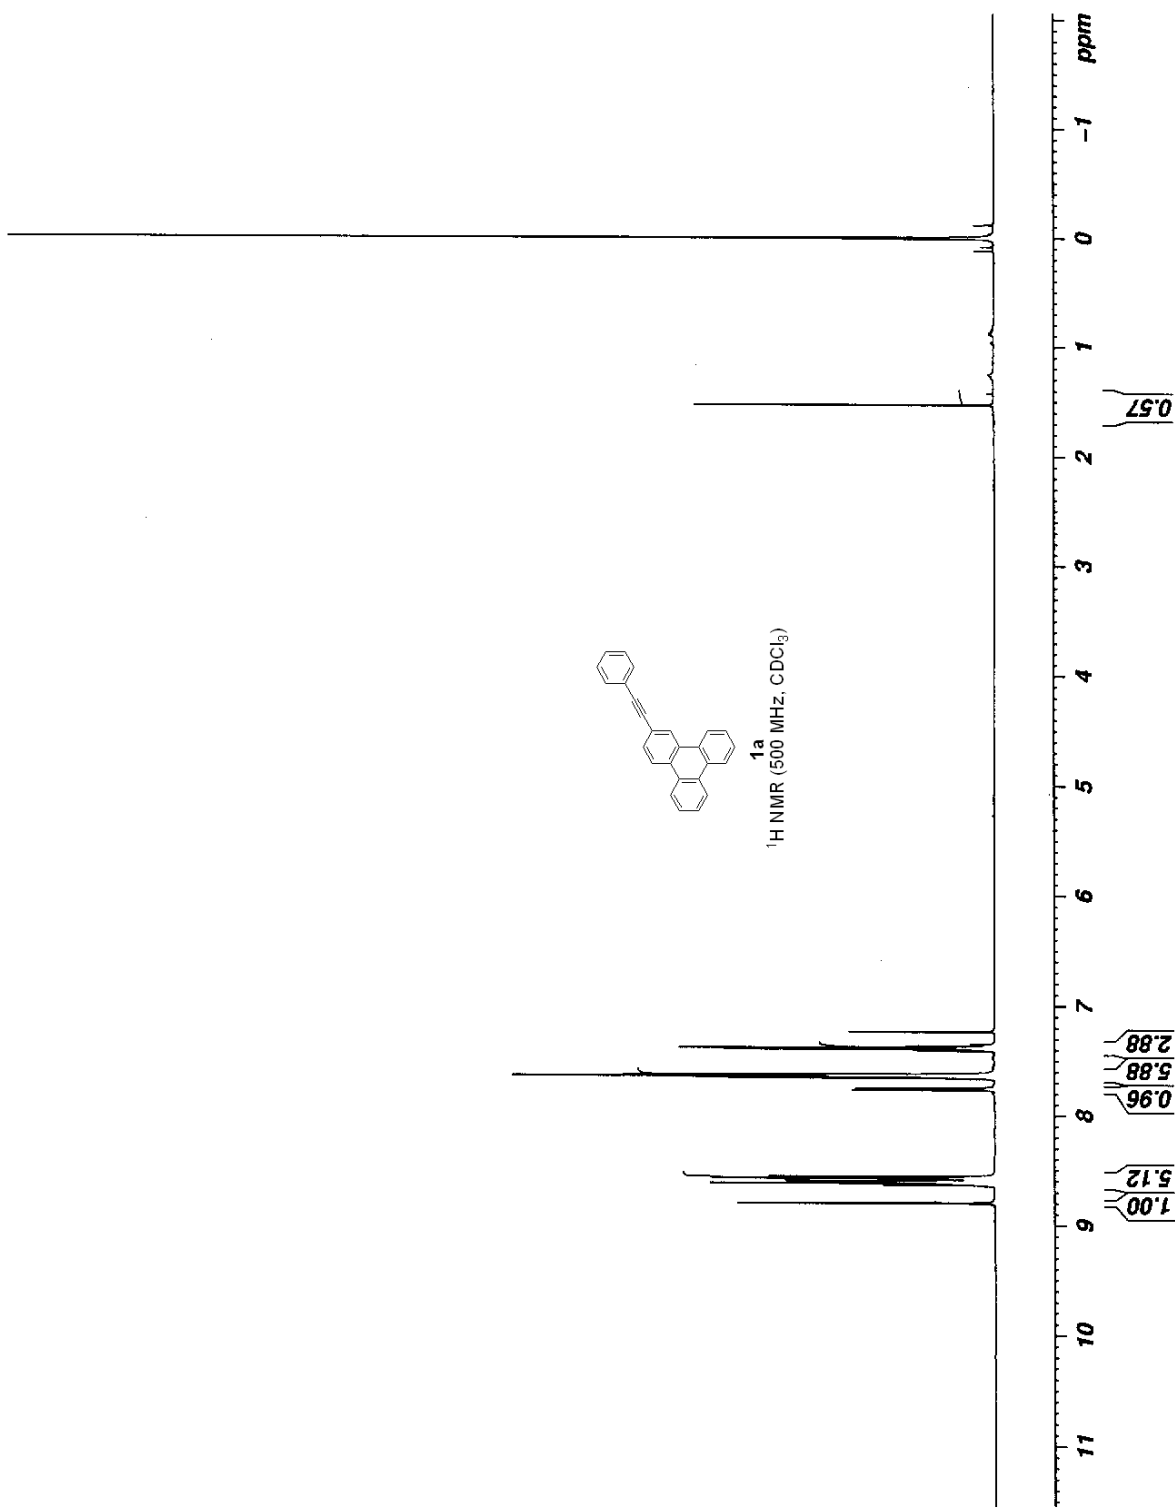

**Figure 1:** <sup>1</sup>H NMR spectrum of **1a** in CDCl<sub>3</sub>.

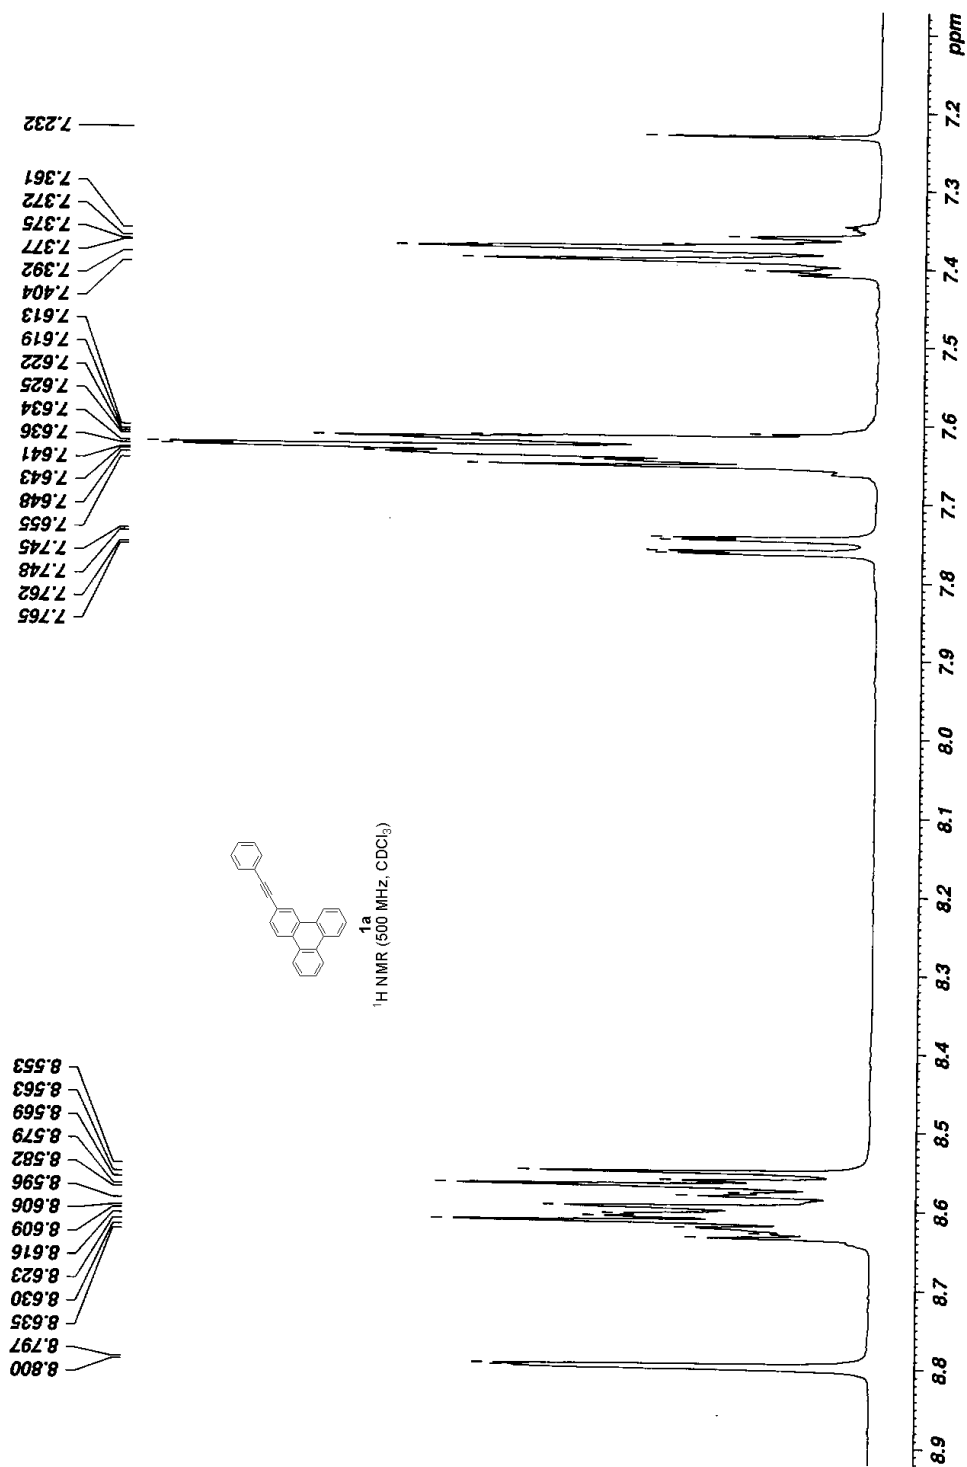

**Figure 2:** Expanded aromatic region of  $^1\text{H}$  NMR spectrum of **1a** in  $\text{CDCl}_3$ .



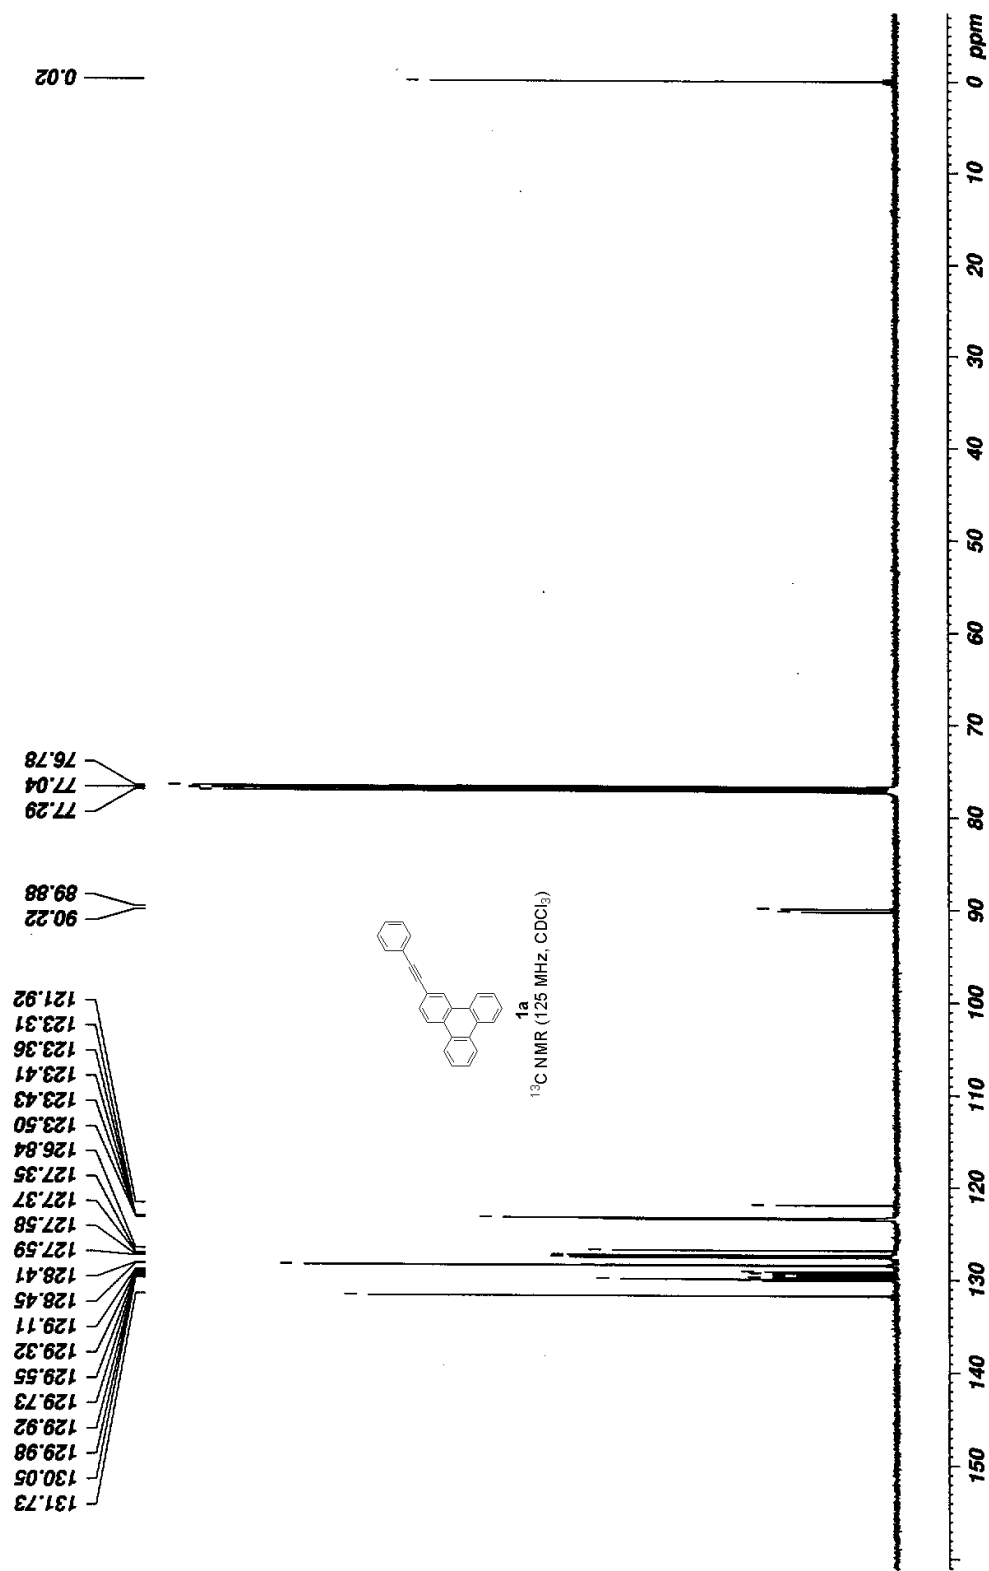

Figure 3:  $^{13}\text{C}$  NMR spectrum of **1a** in  $\text{CDCl}_3$ .

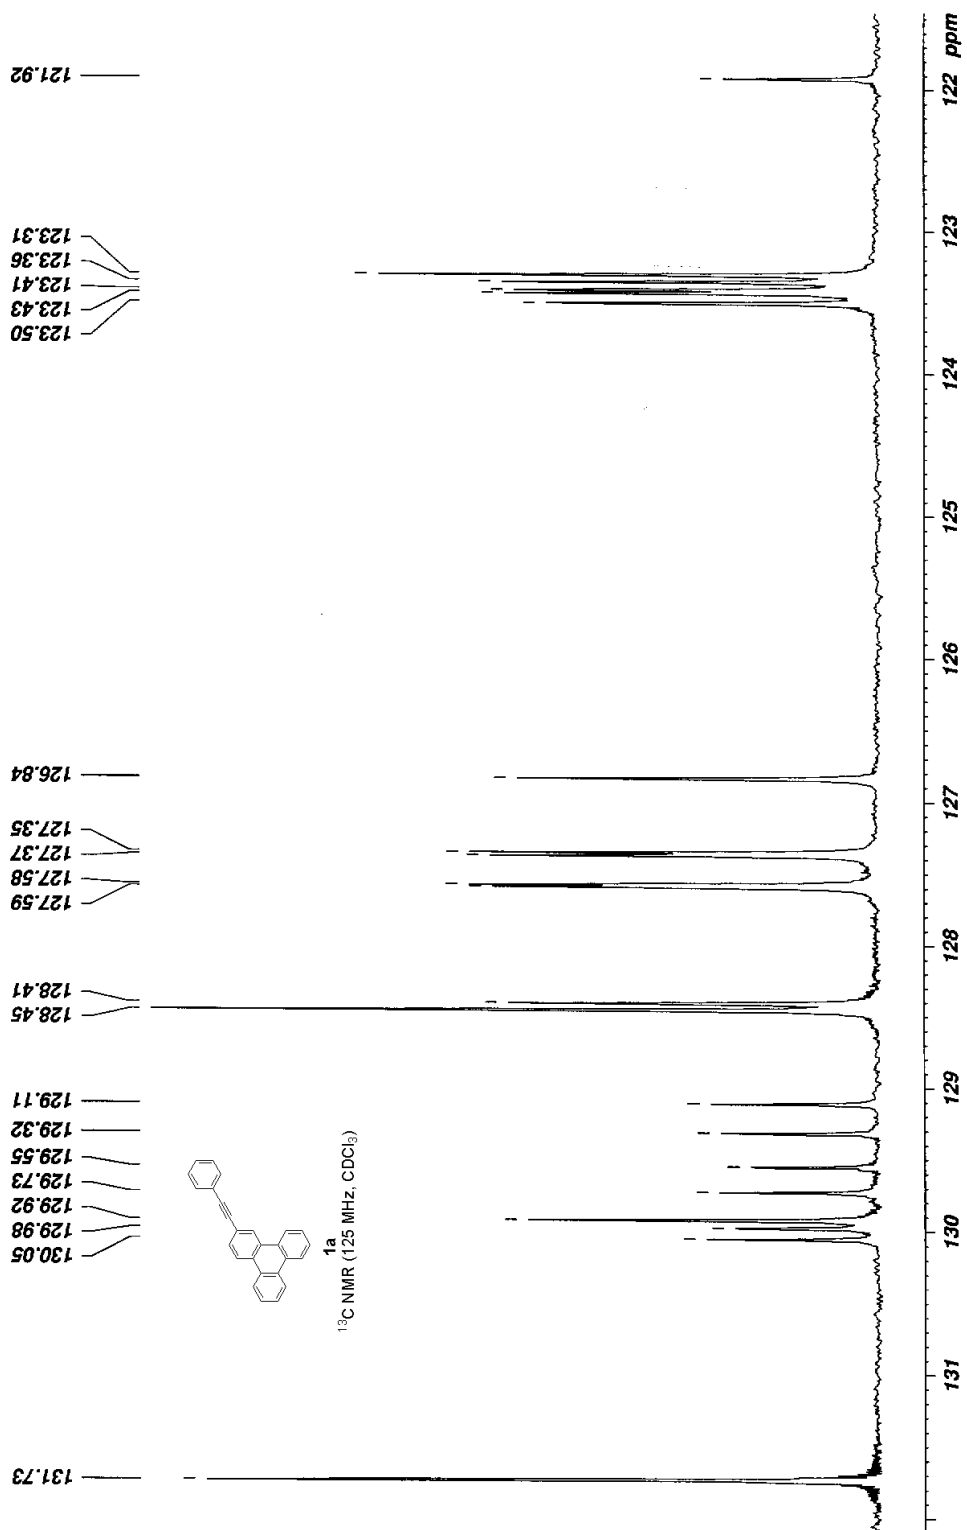

**Figure 4:** Expanded aromatic region of <sup>13</sup>C NMR spectrum of **1a** in CDCl<sub>3</sub>.

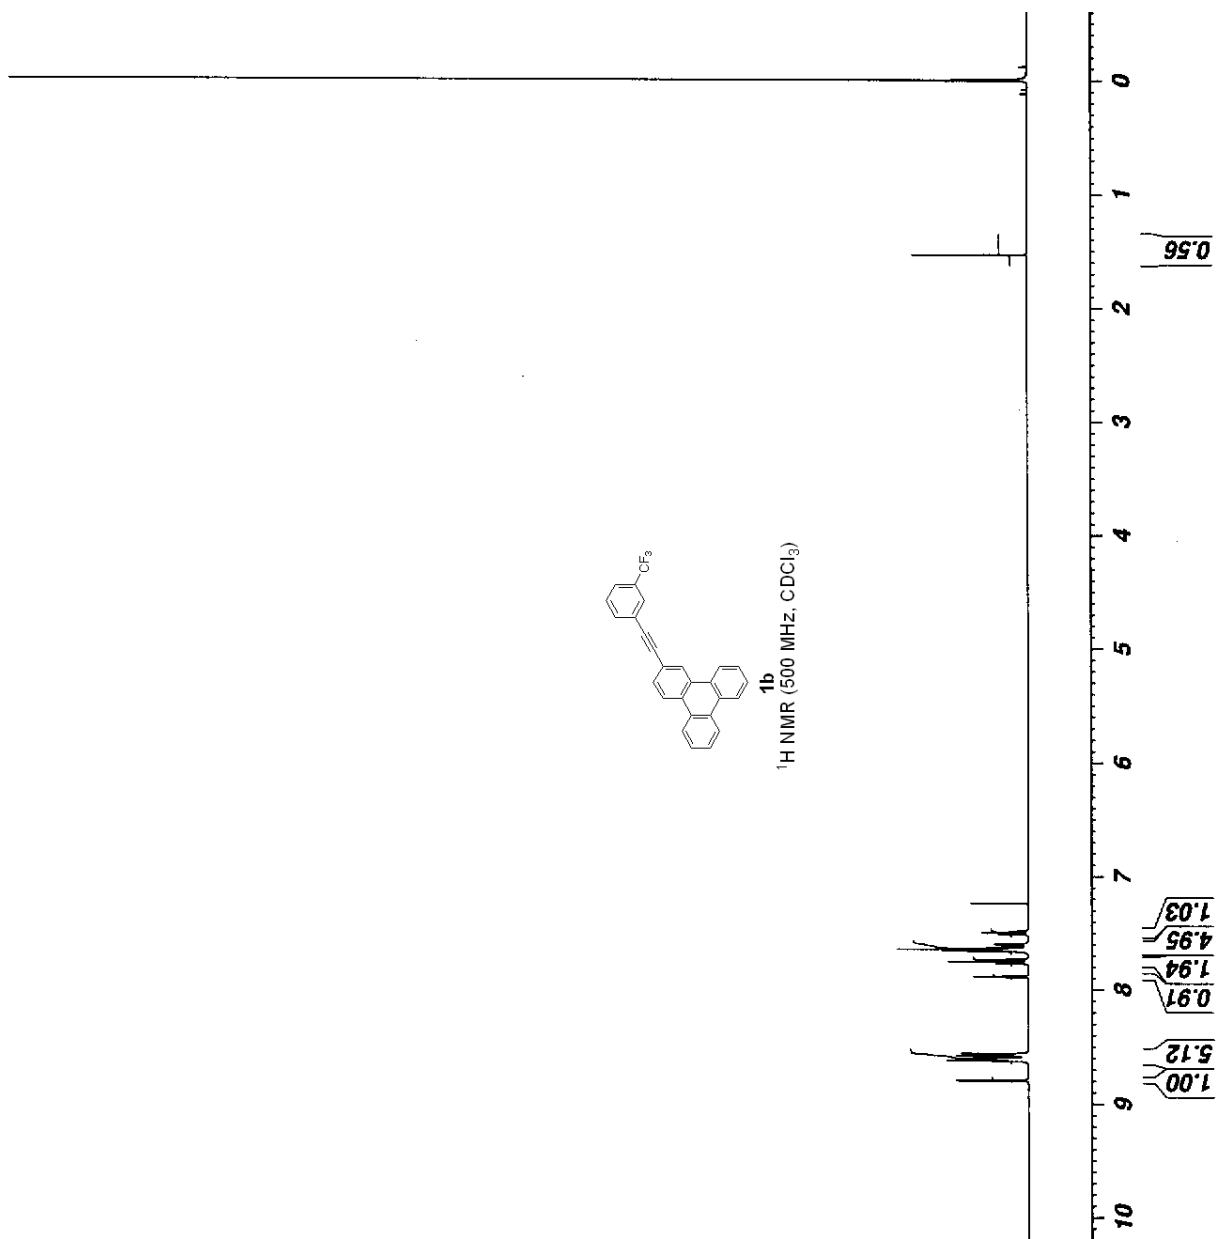

**Figure 5:**  $^1\text{H NMR}$  spectrum of **1b** in  $\text{CDCl}_3$ .

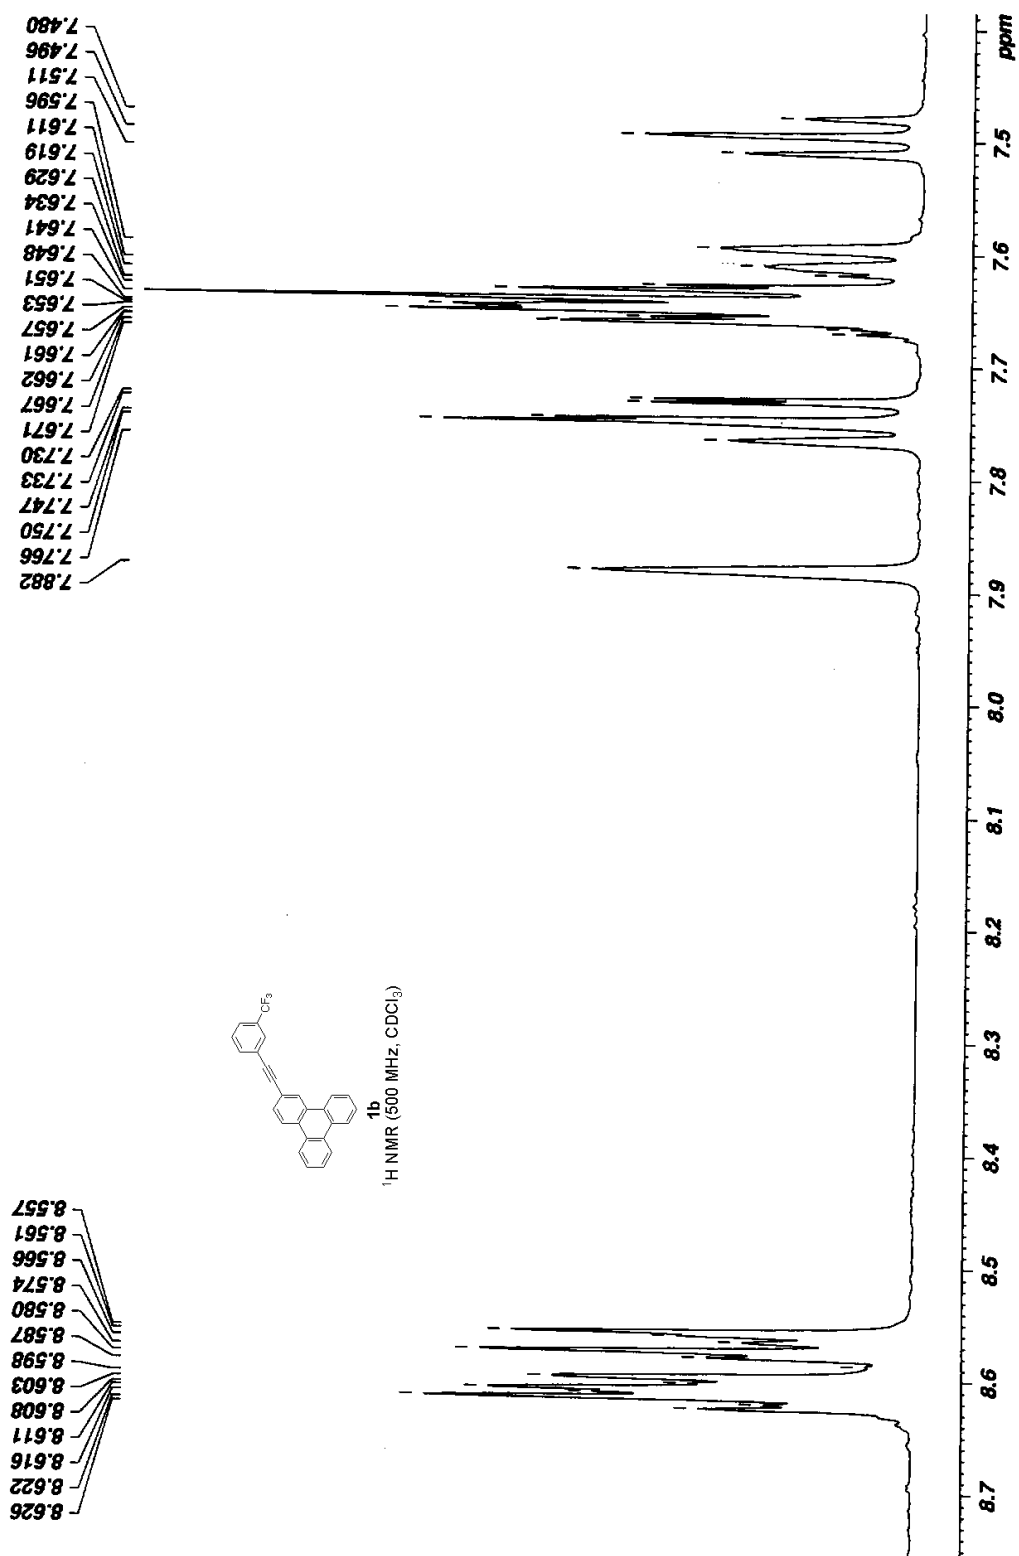

Figure 6: Expanded aromatic region of  $^1\text{H NMR}$  spectrum of **1b** in  $\text{CDCl}_3$ .

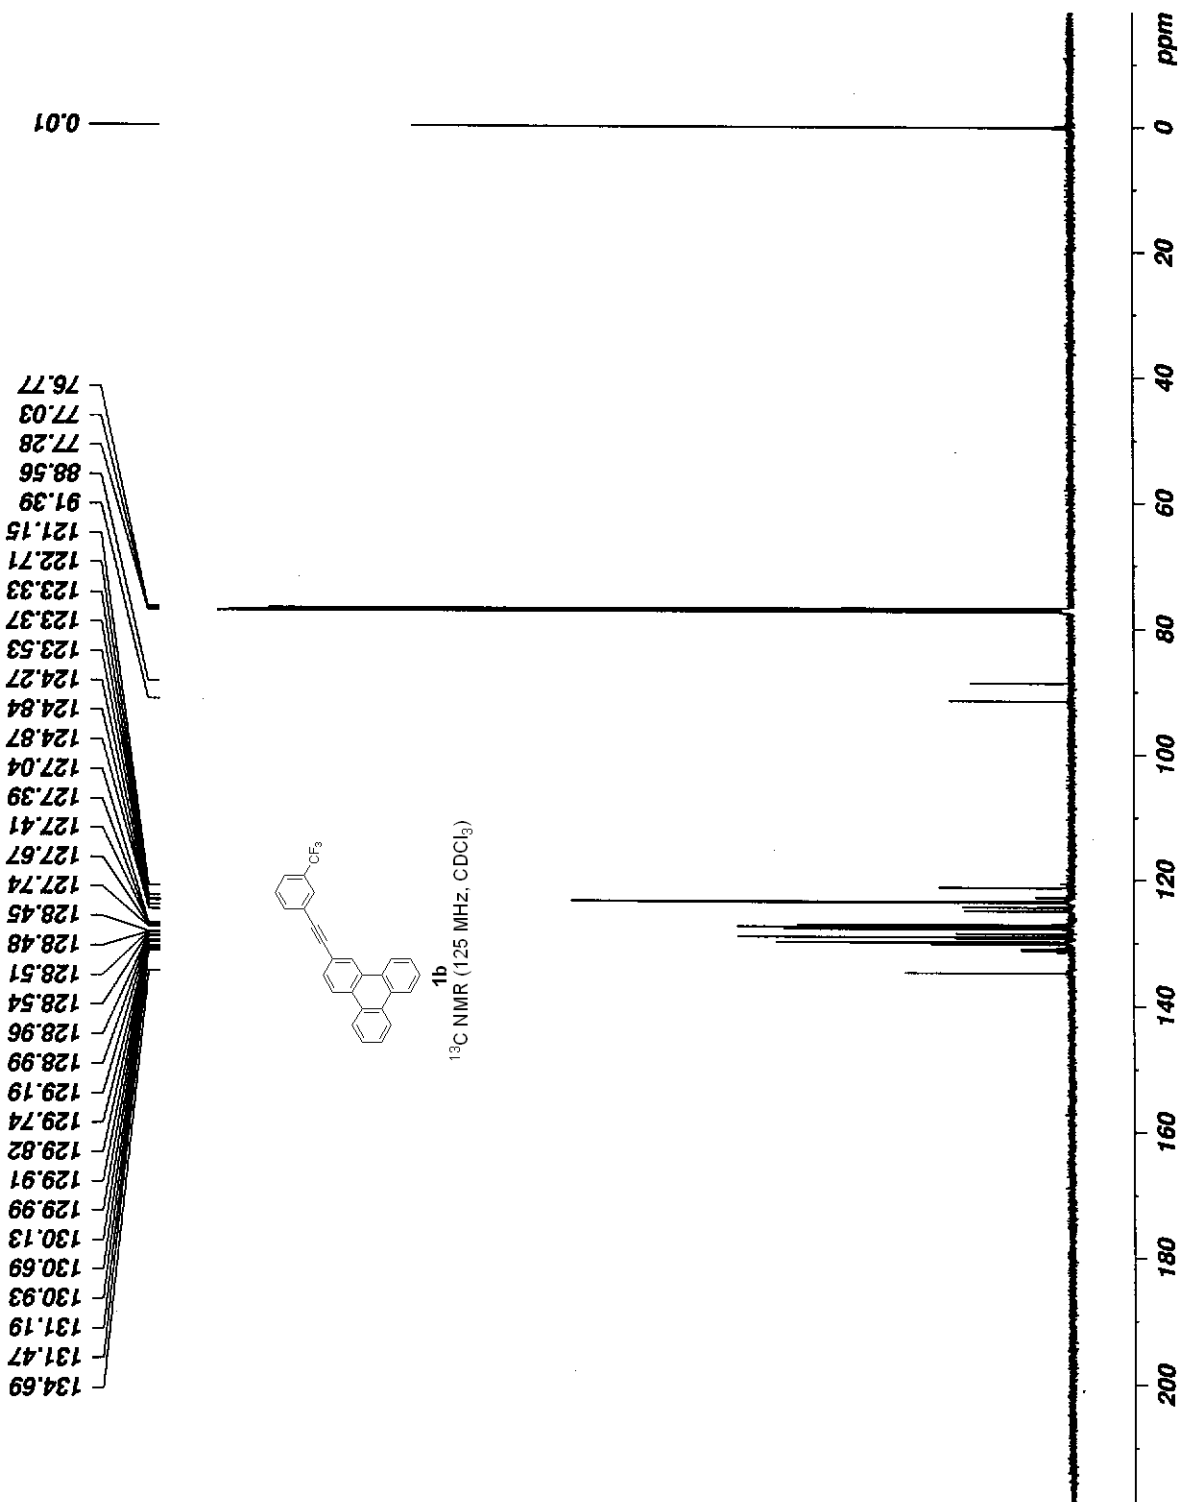

Figure 7:  $^{13}\text{C}$  NMR spectrum of **1b** in  $\text{CDCl}_3$ .

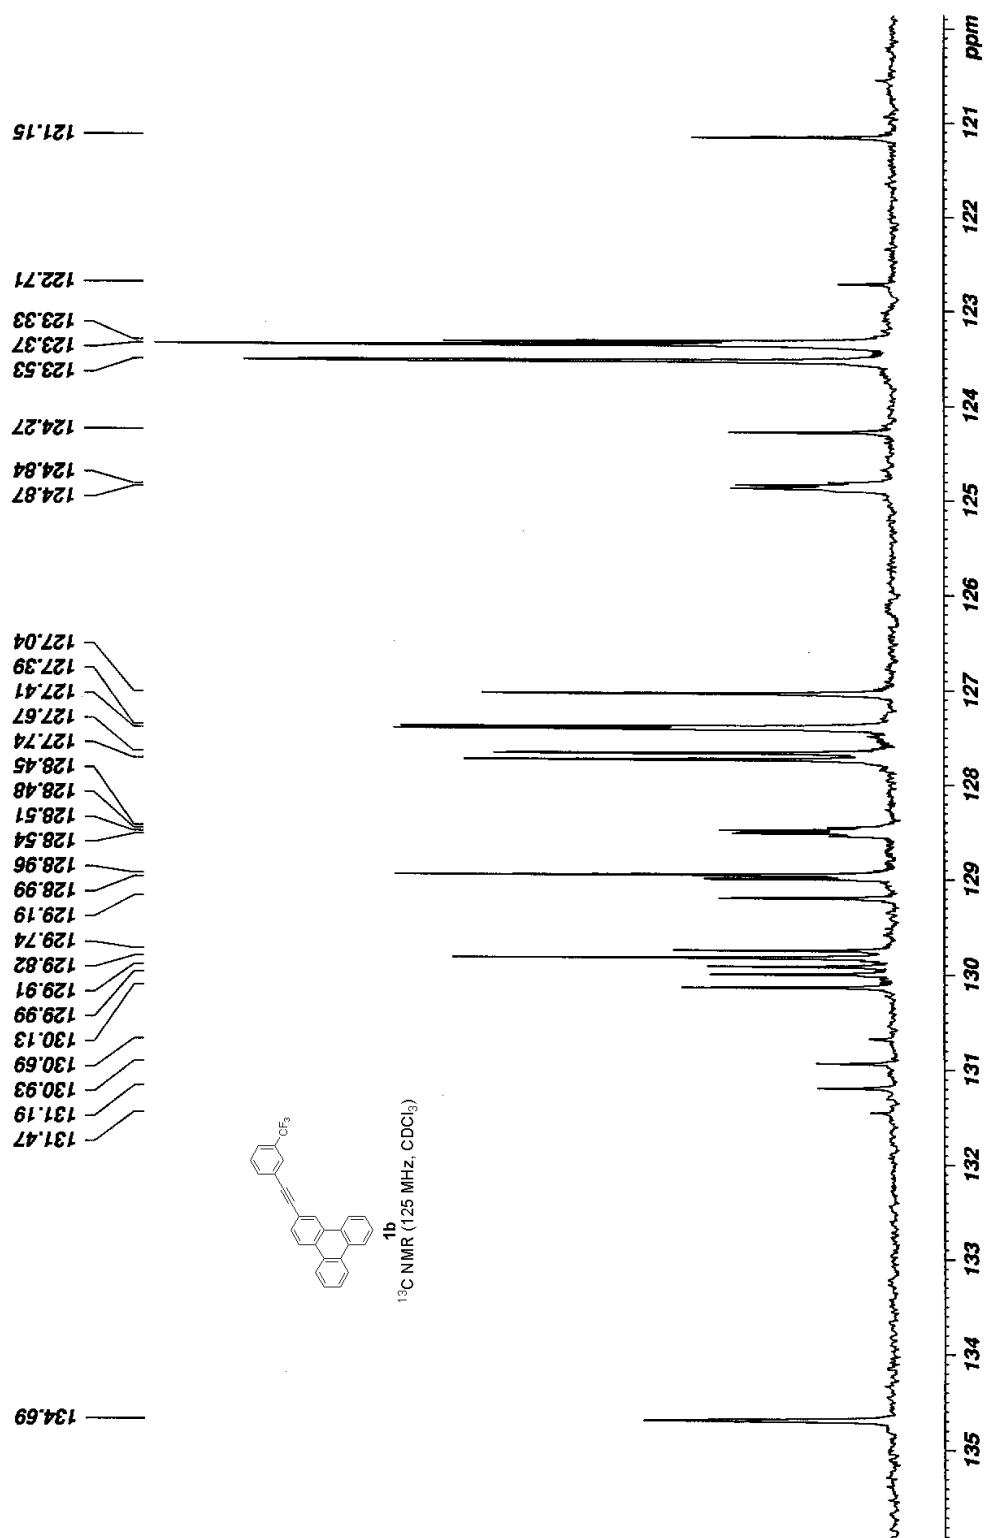

Figure 8: Expanded aromatic region of  $^{13}\text{C}$  NMR spectrum of **1b** in  $\text{CDCl}_3$ .

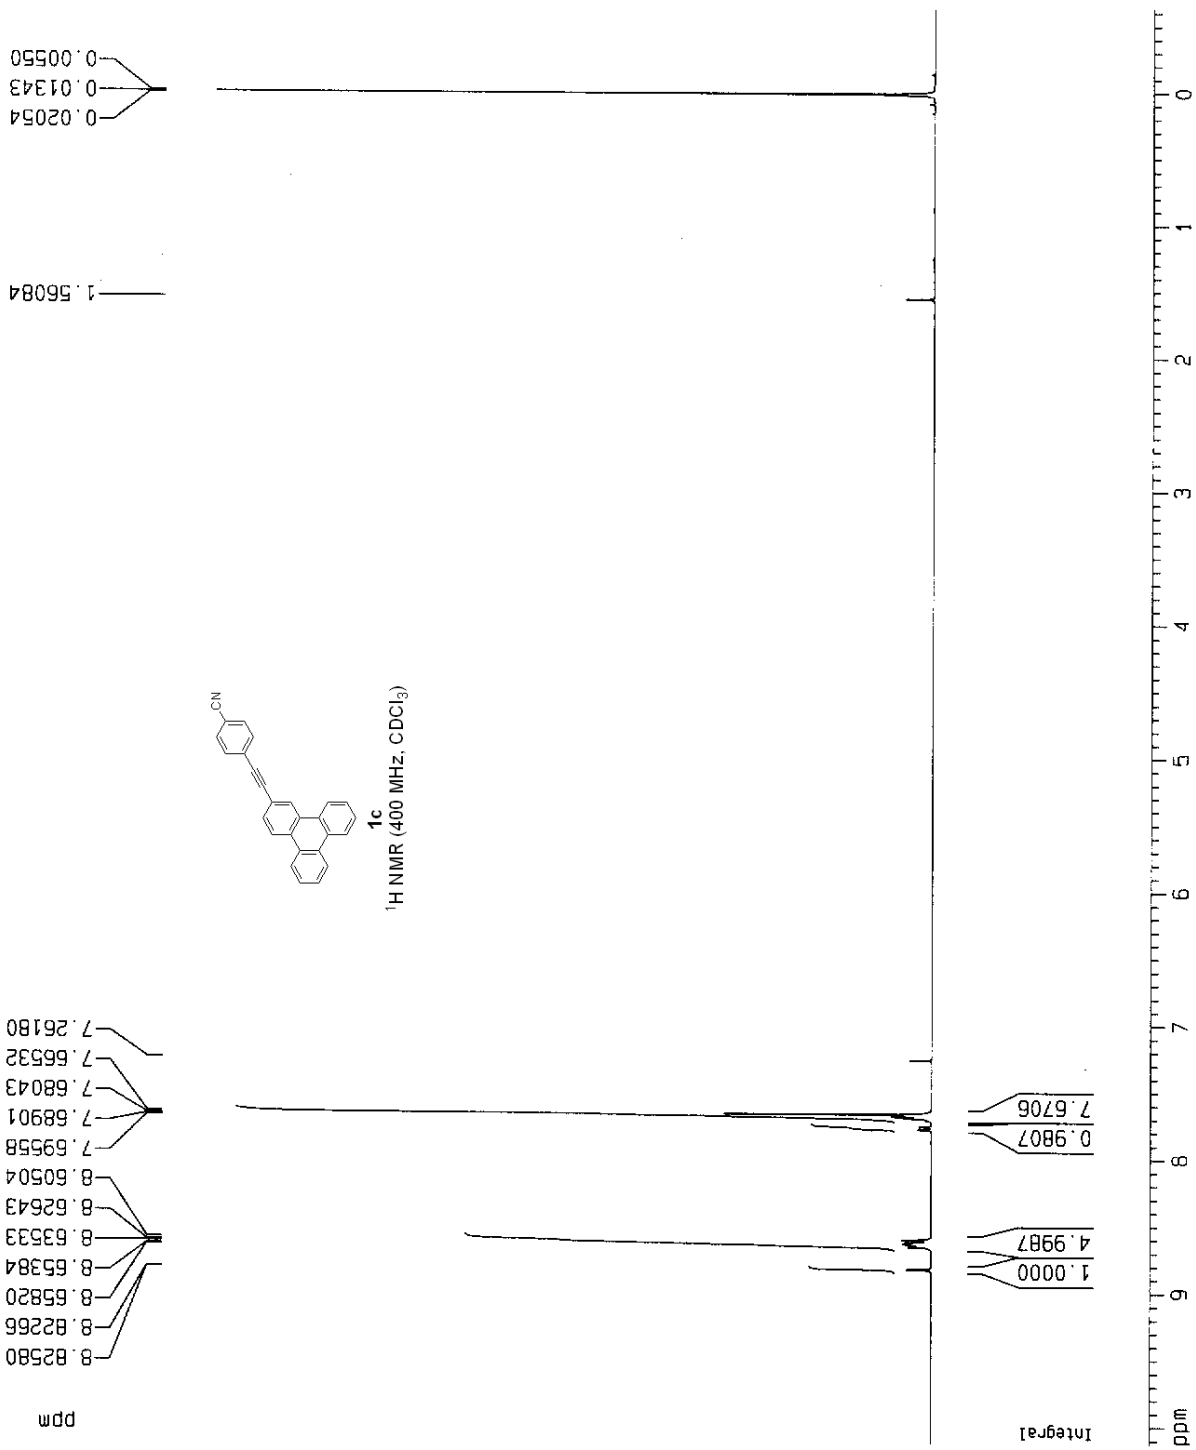

**Figure 9:** <sup>1</sup>H NMR spectrum of **1c** in CDCl<sub>3</sub>.

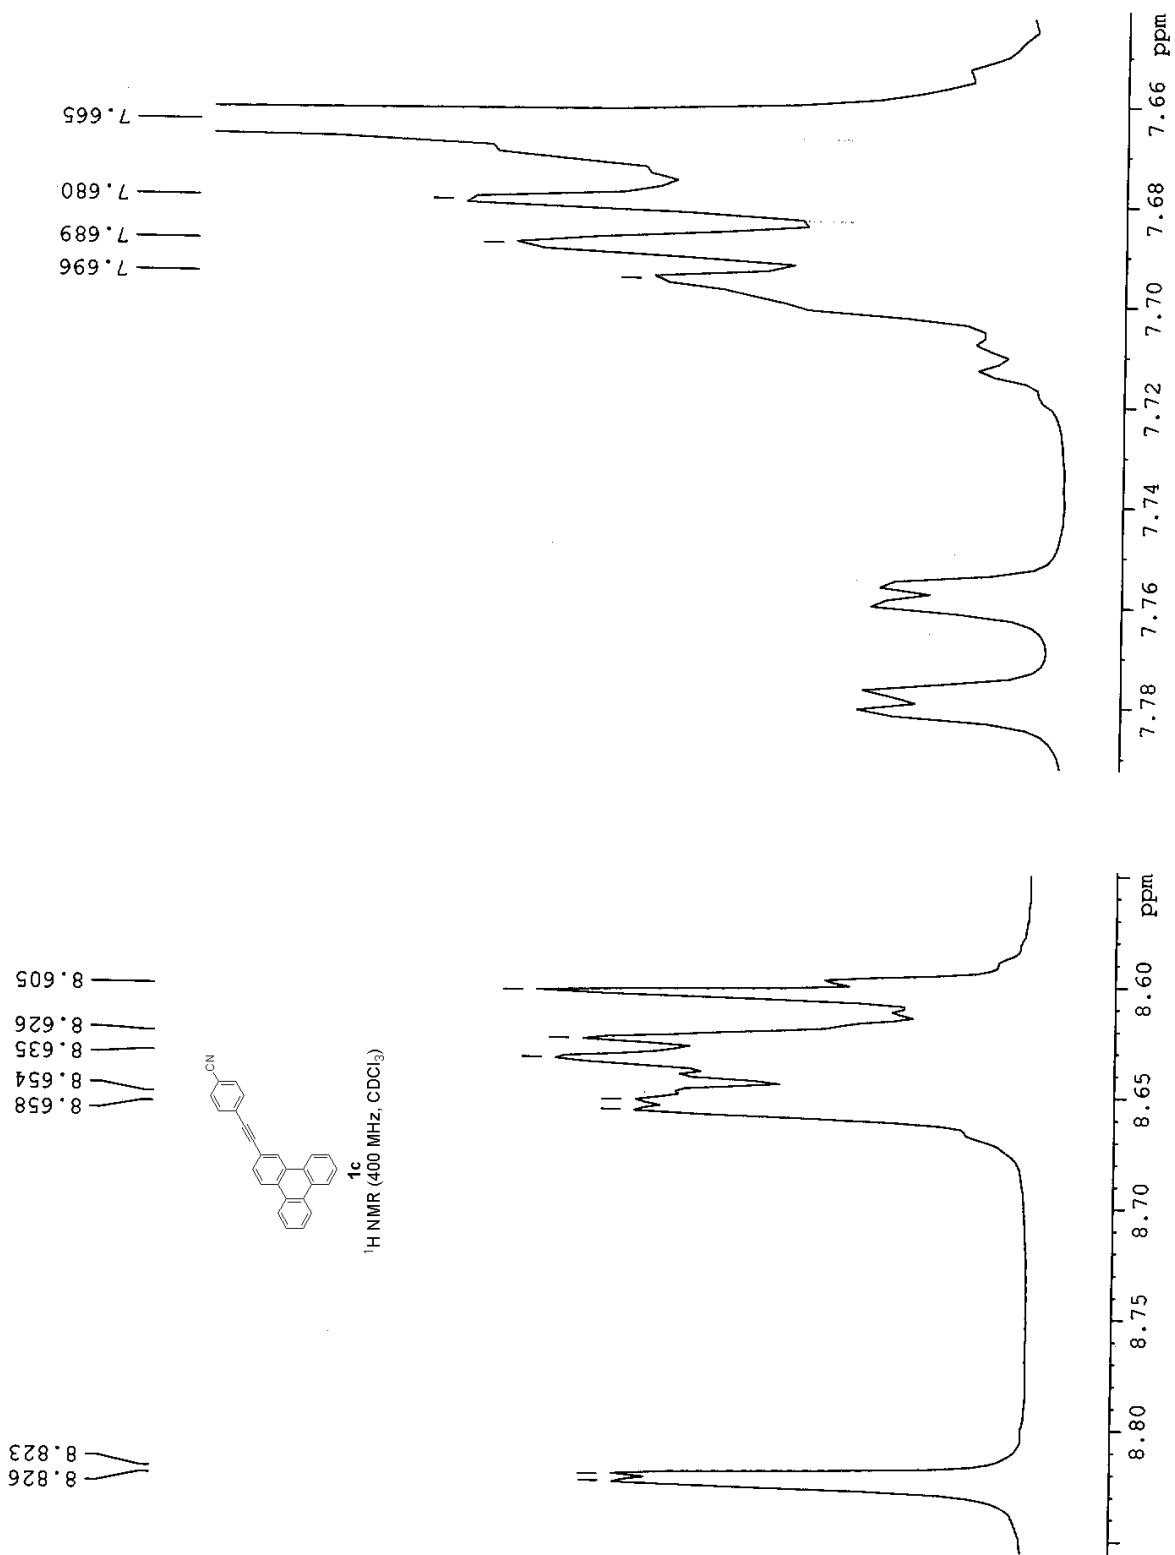

**Figure 10:** Expanded aromatic region of <sup>1</sup>H NMR spectrum of **1c** in CDCl<sub>3</sub>.



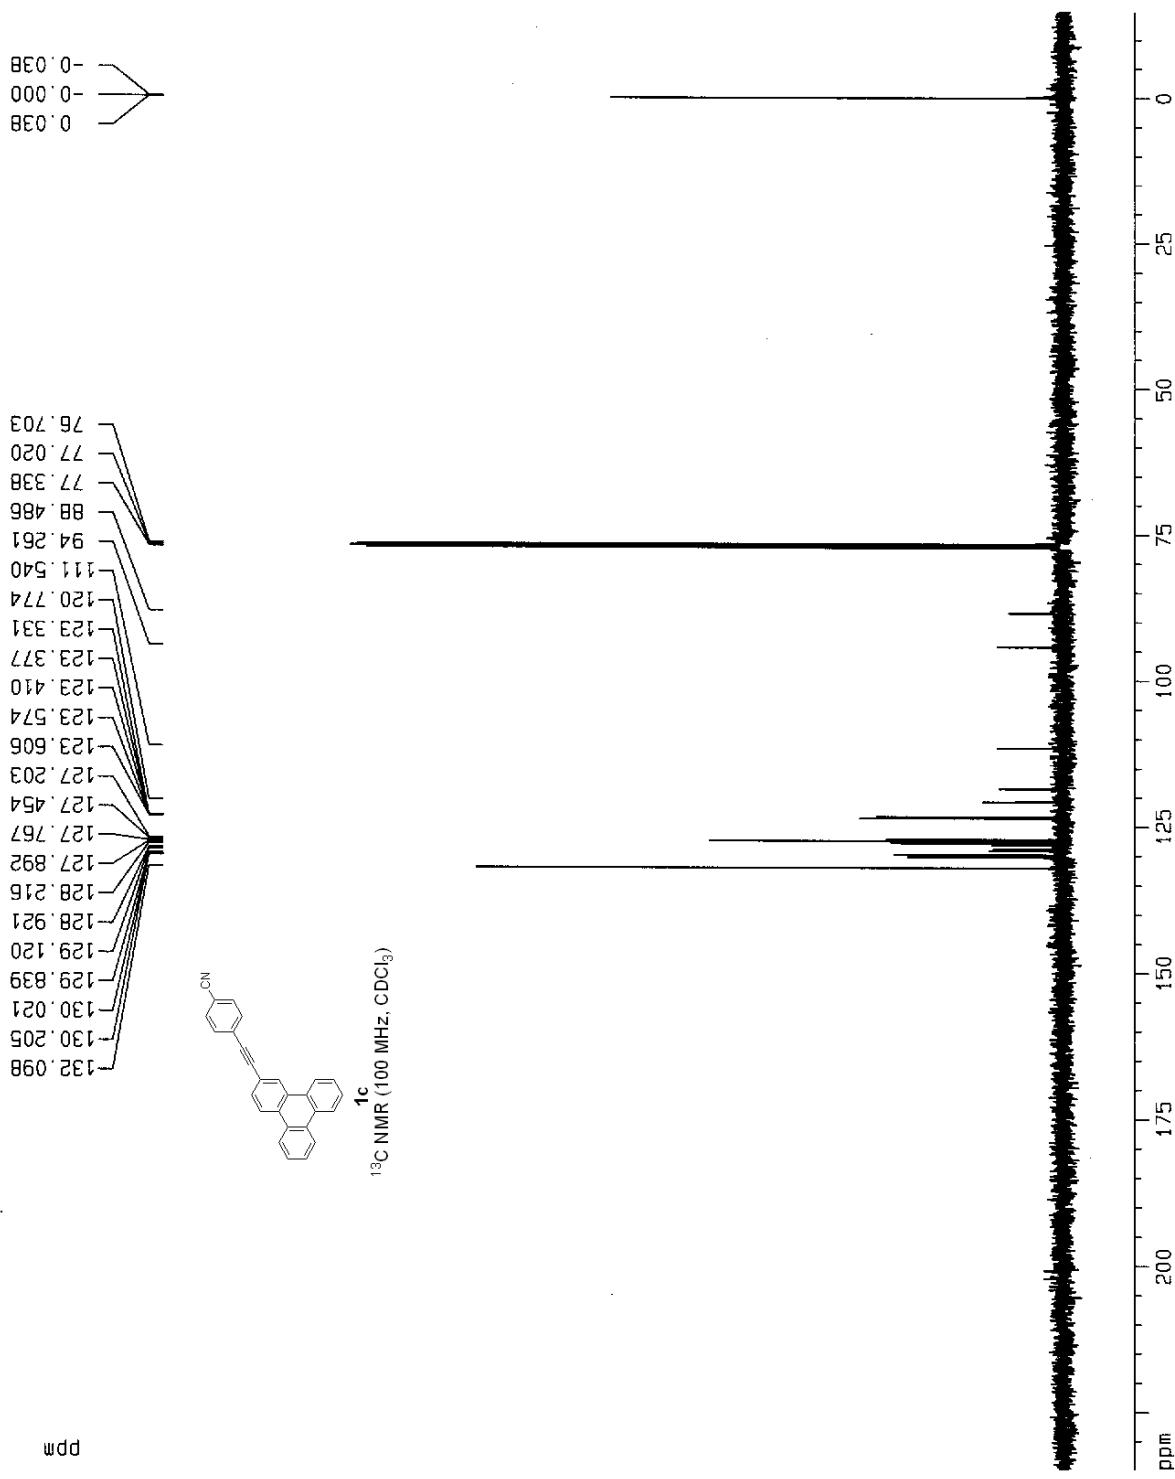

Figure 11: <sup>13</sup>C NMR spectrum of **1c** in CDCl<sub>3</sub>.

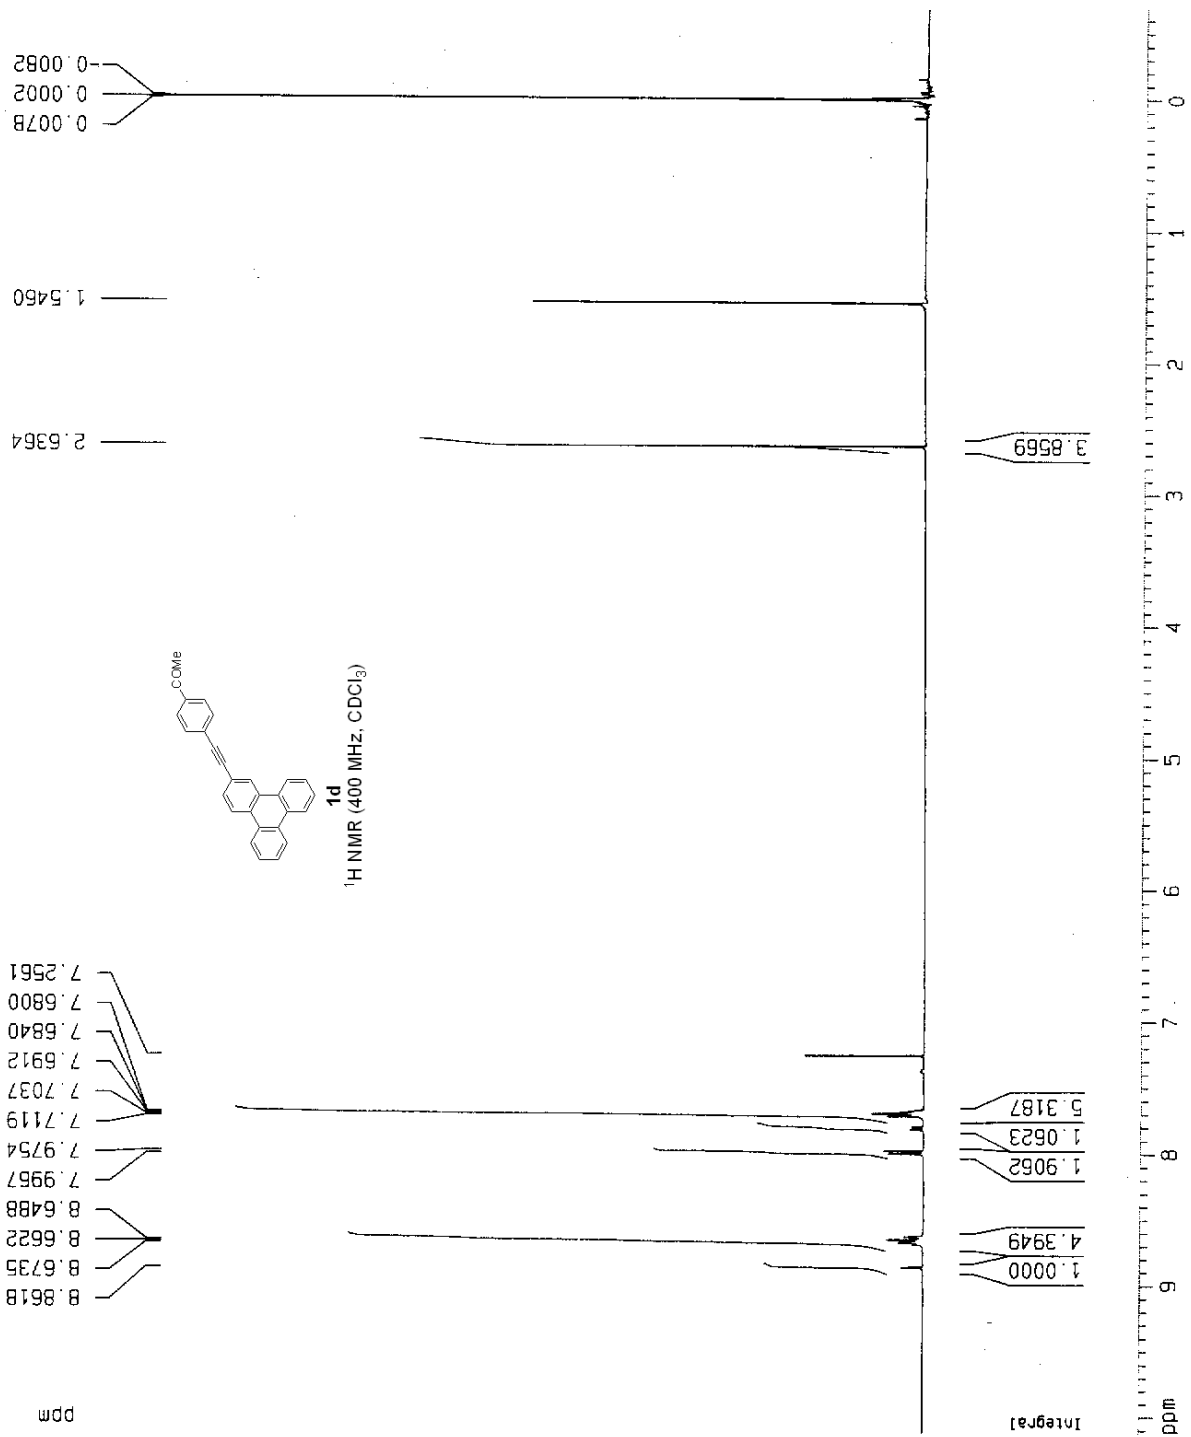

**Figure 12:** <sup>1</sup>H NMR spectrum of **1d** in CDCl<sub>3</sub>.

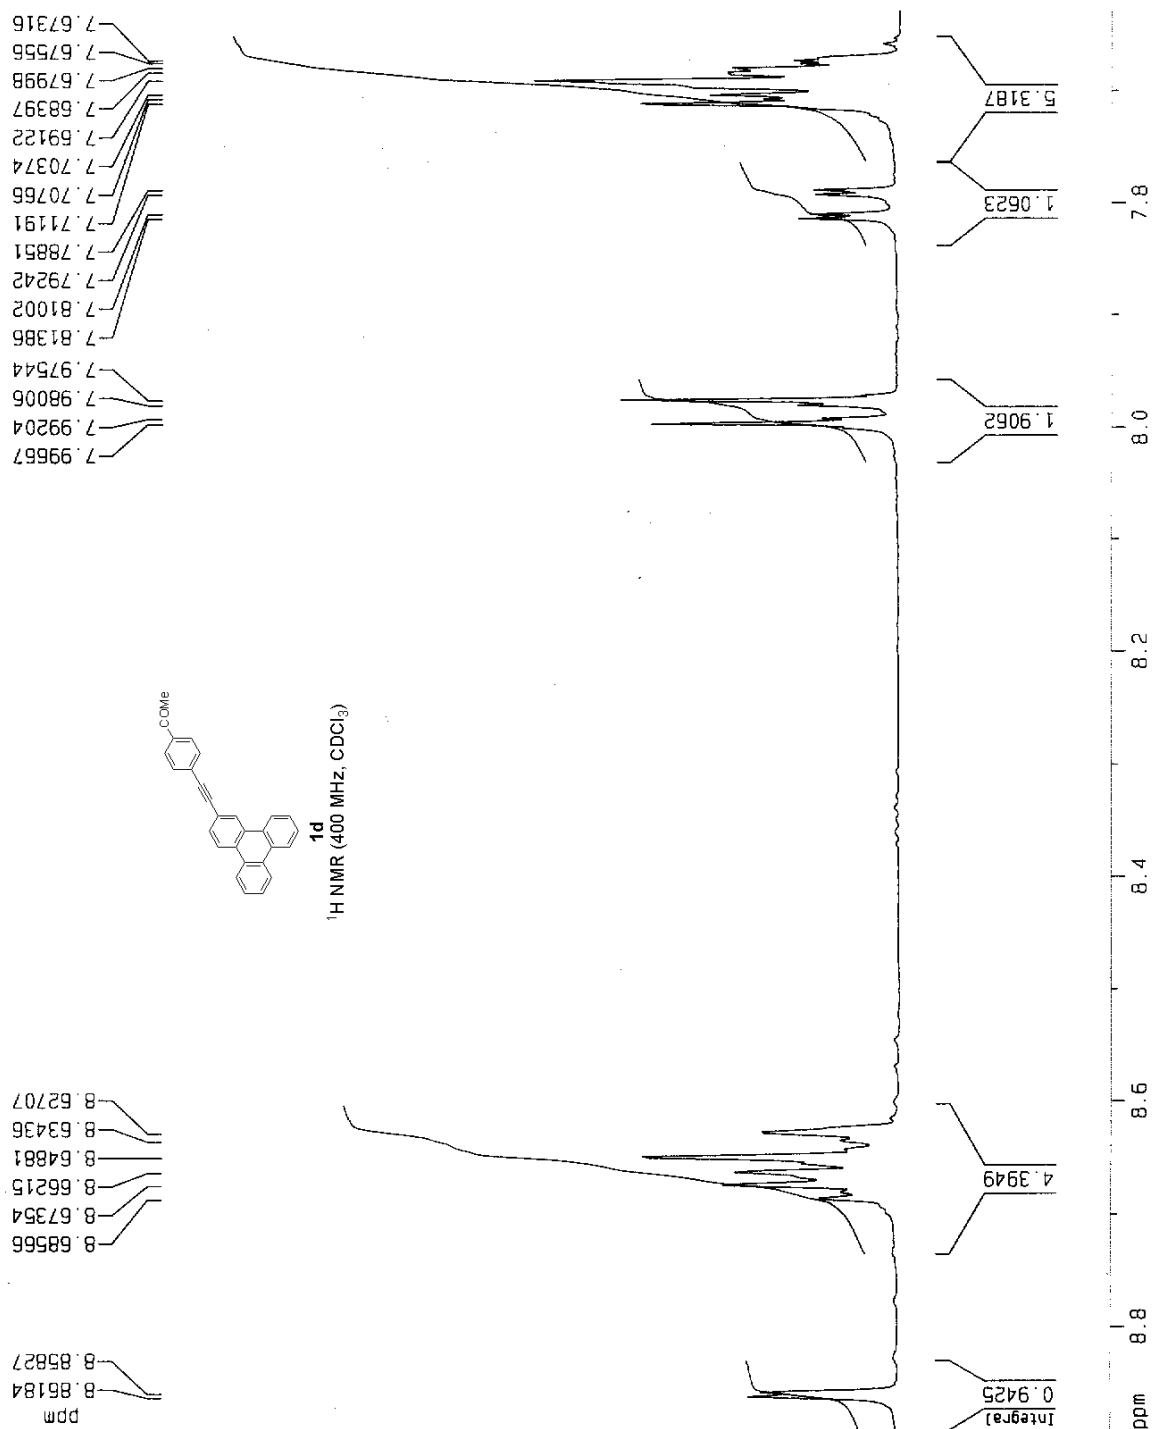

**Figure 13:** Expanded aromatic region of <sup>1</sup>H NMR spectrum of **1d** in CDCl<sub>3</sub>.

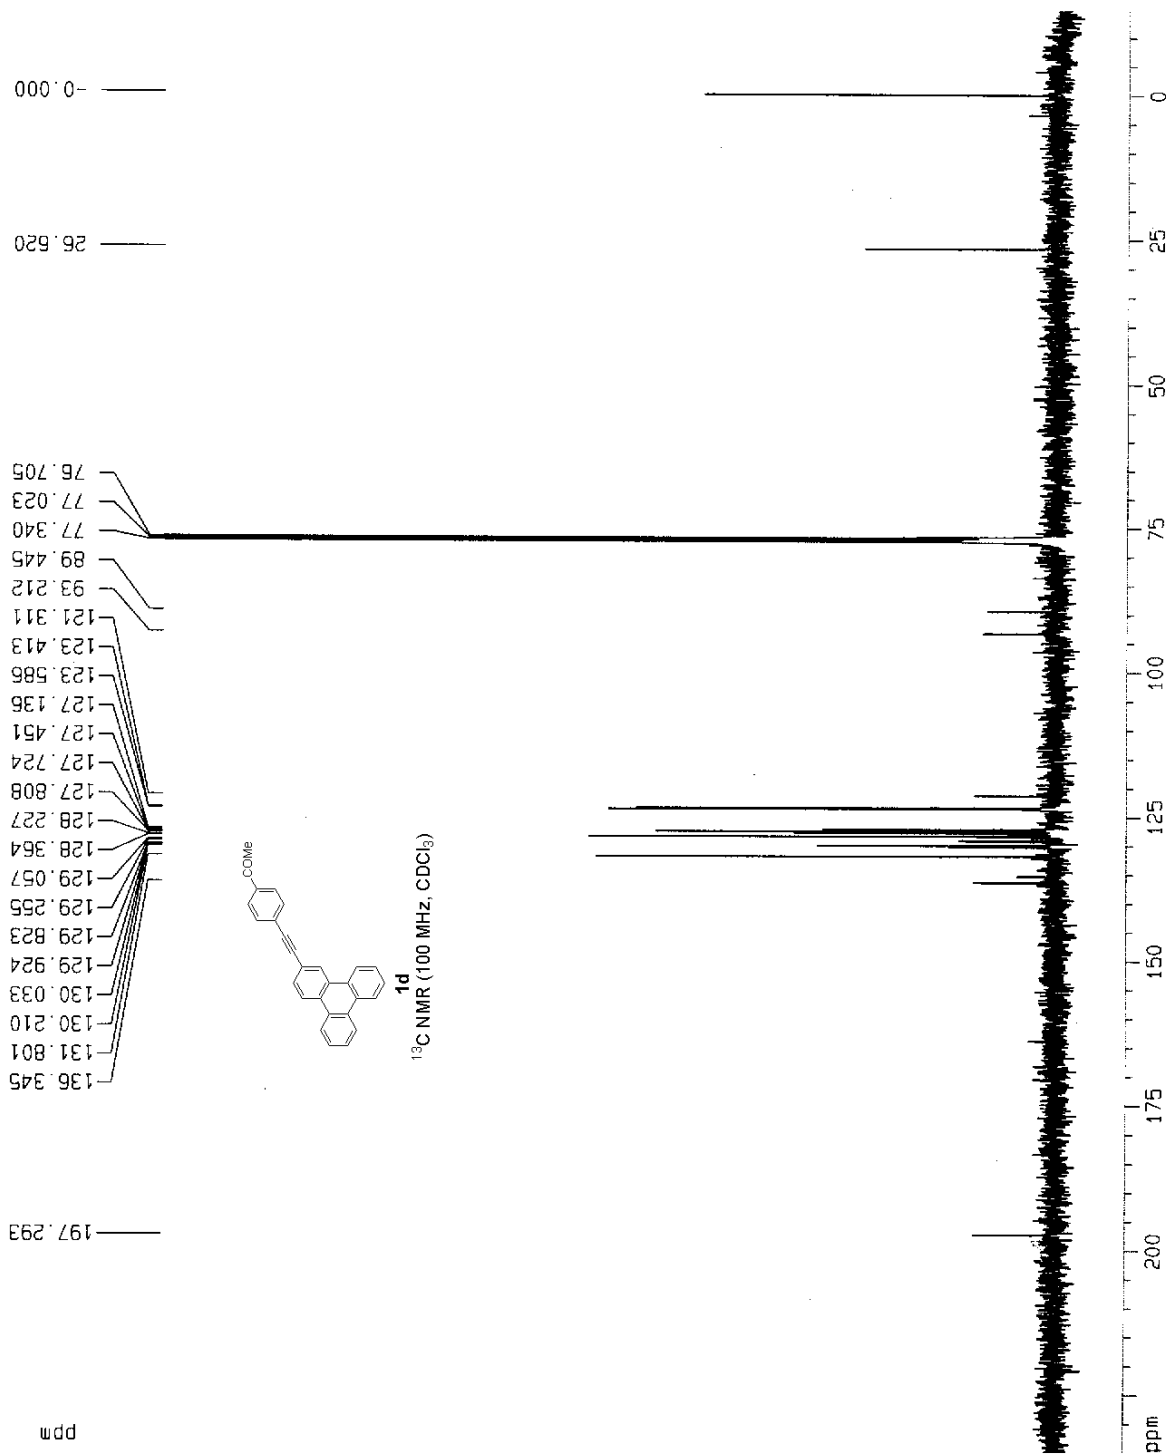

**Figure 14:**  $^{13}\text{C}$  NMR spectrum of **1d** in  $\text{CDCl}_3$ .

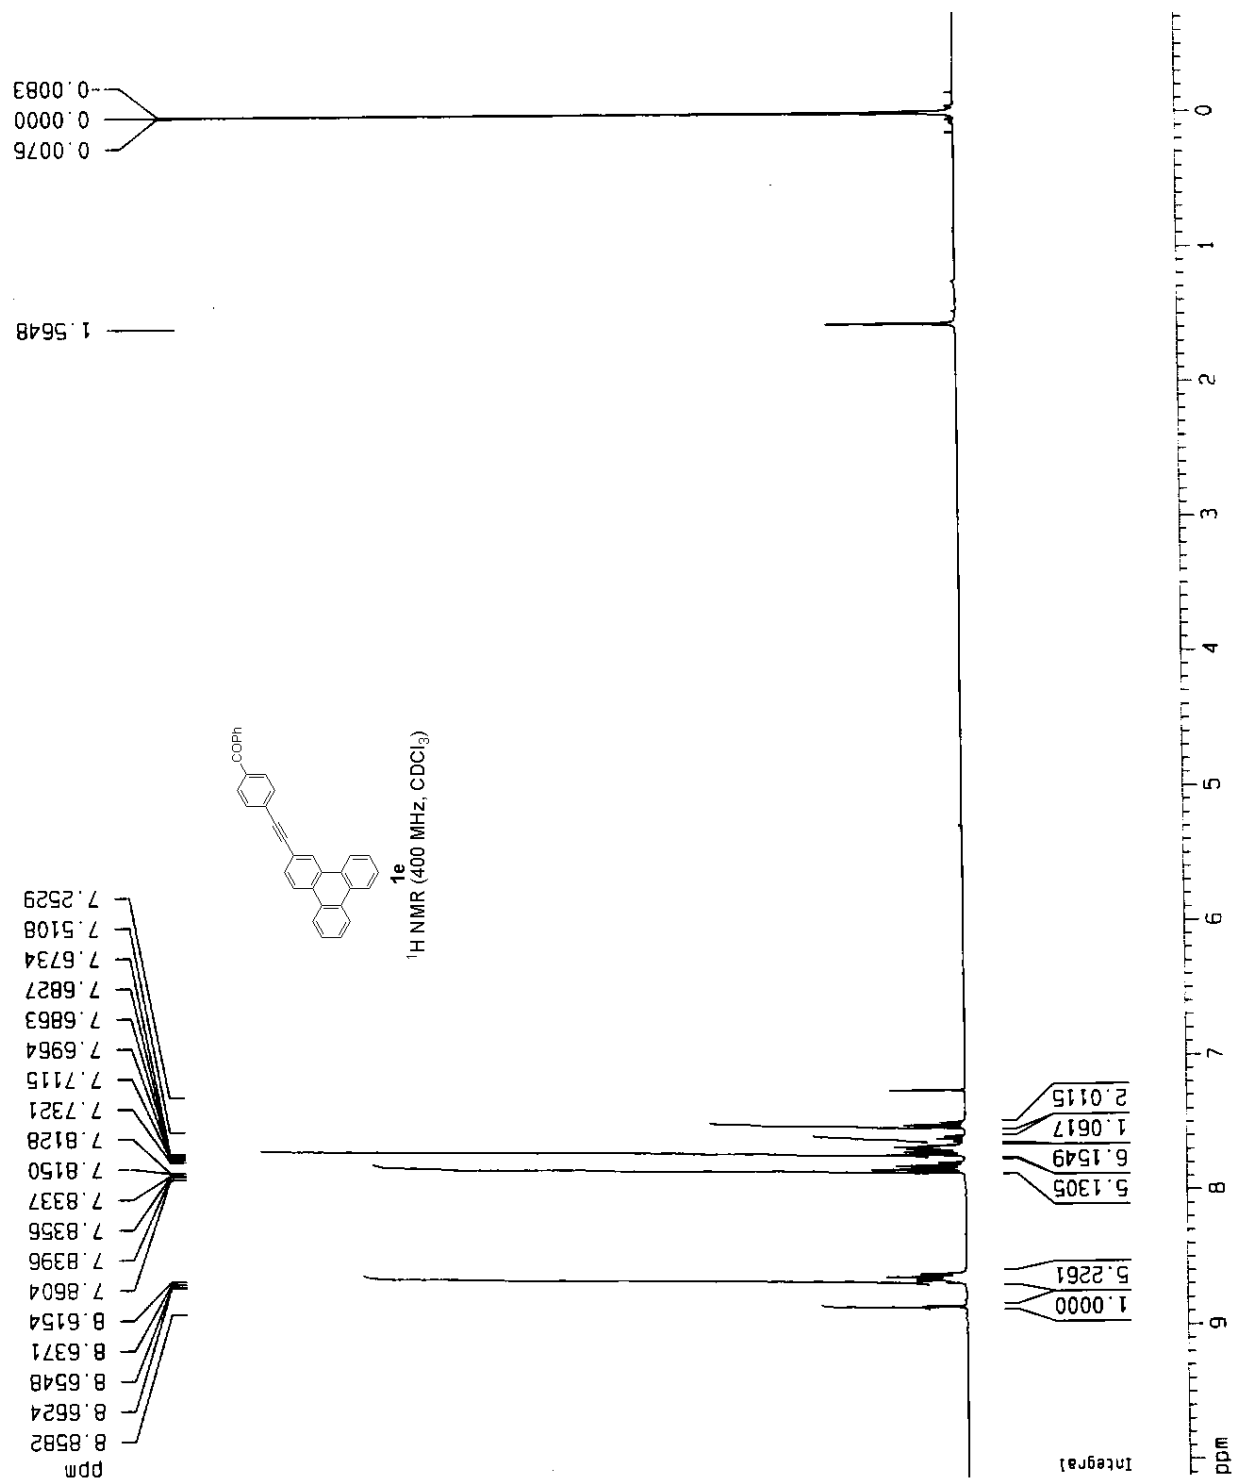

**Figure 15:** <sup>1</sup>H NMR spectrum of **1e** in CDCl<sub>3</sub>.

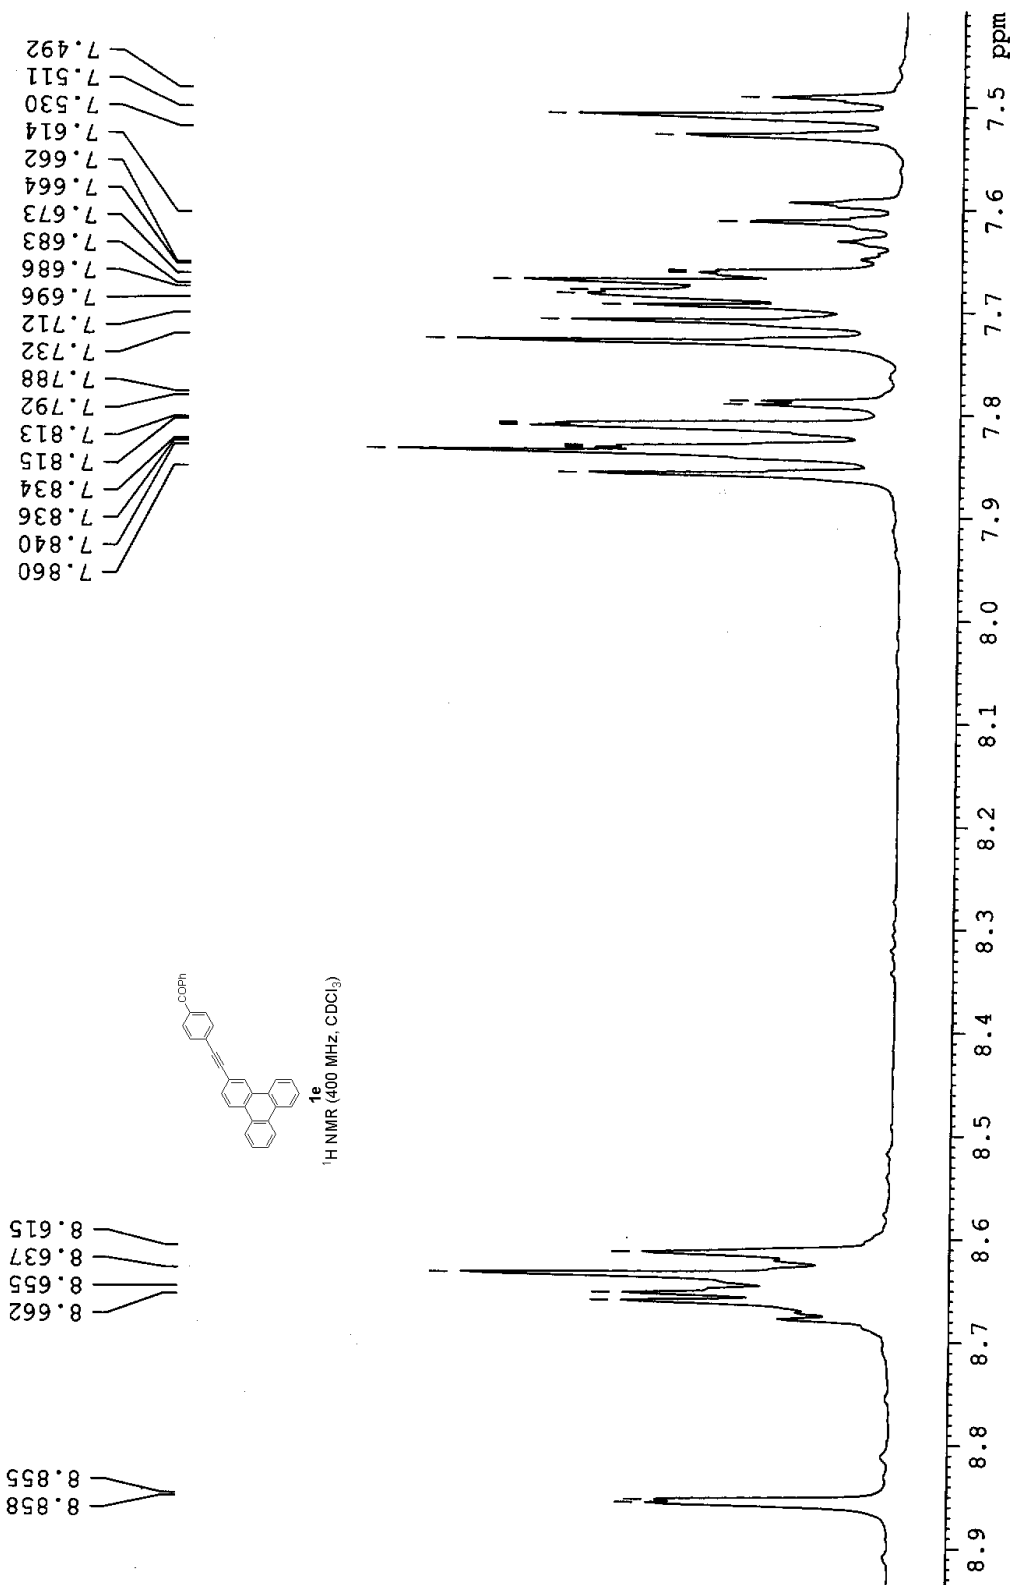

**Figure 16:** Expanded aromatic region of <sup>1</sup>H NMR spectrum of **1e** in CDCl<sub>3</sub>.

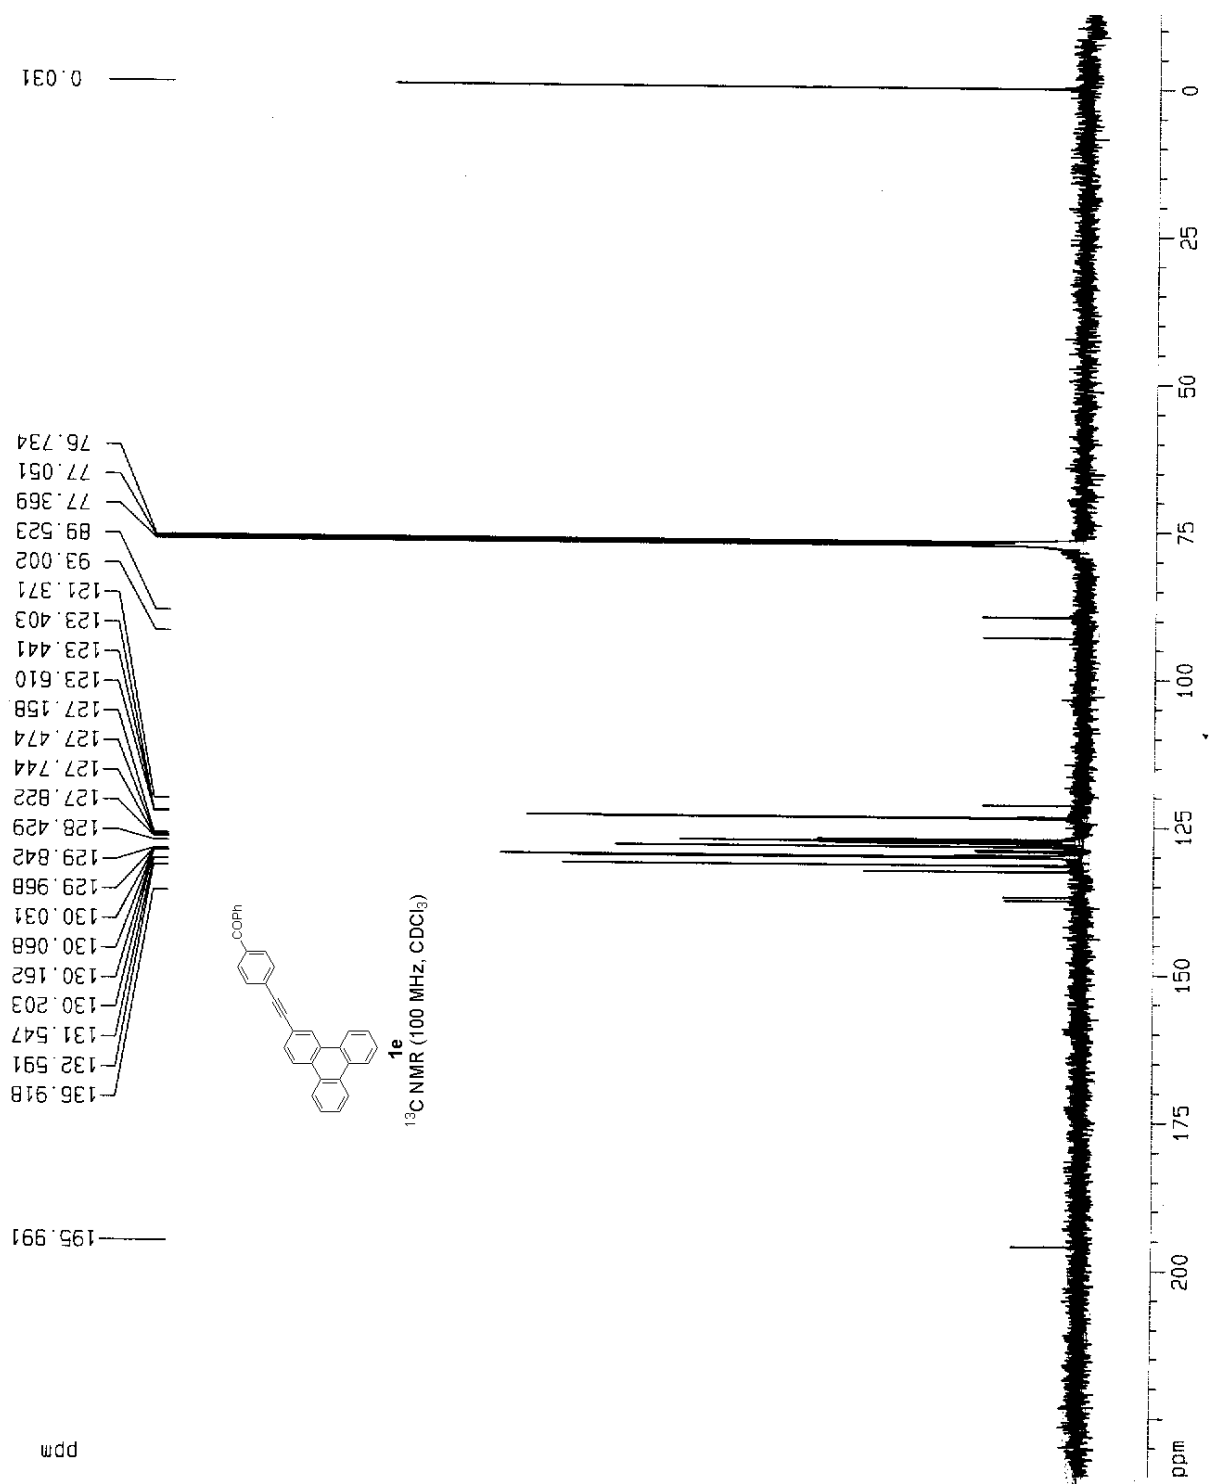

**Figure 17:** <sup>13</sup>C NMR spectrum of **1e** in CDCl<sub>3</sub>.

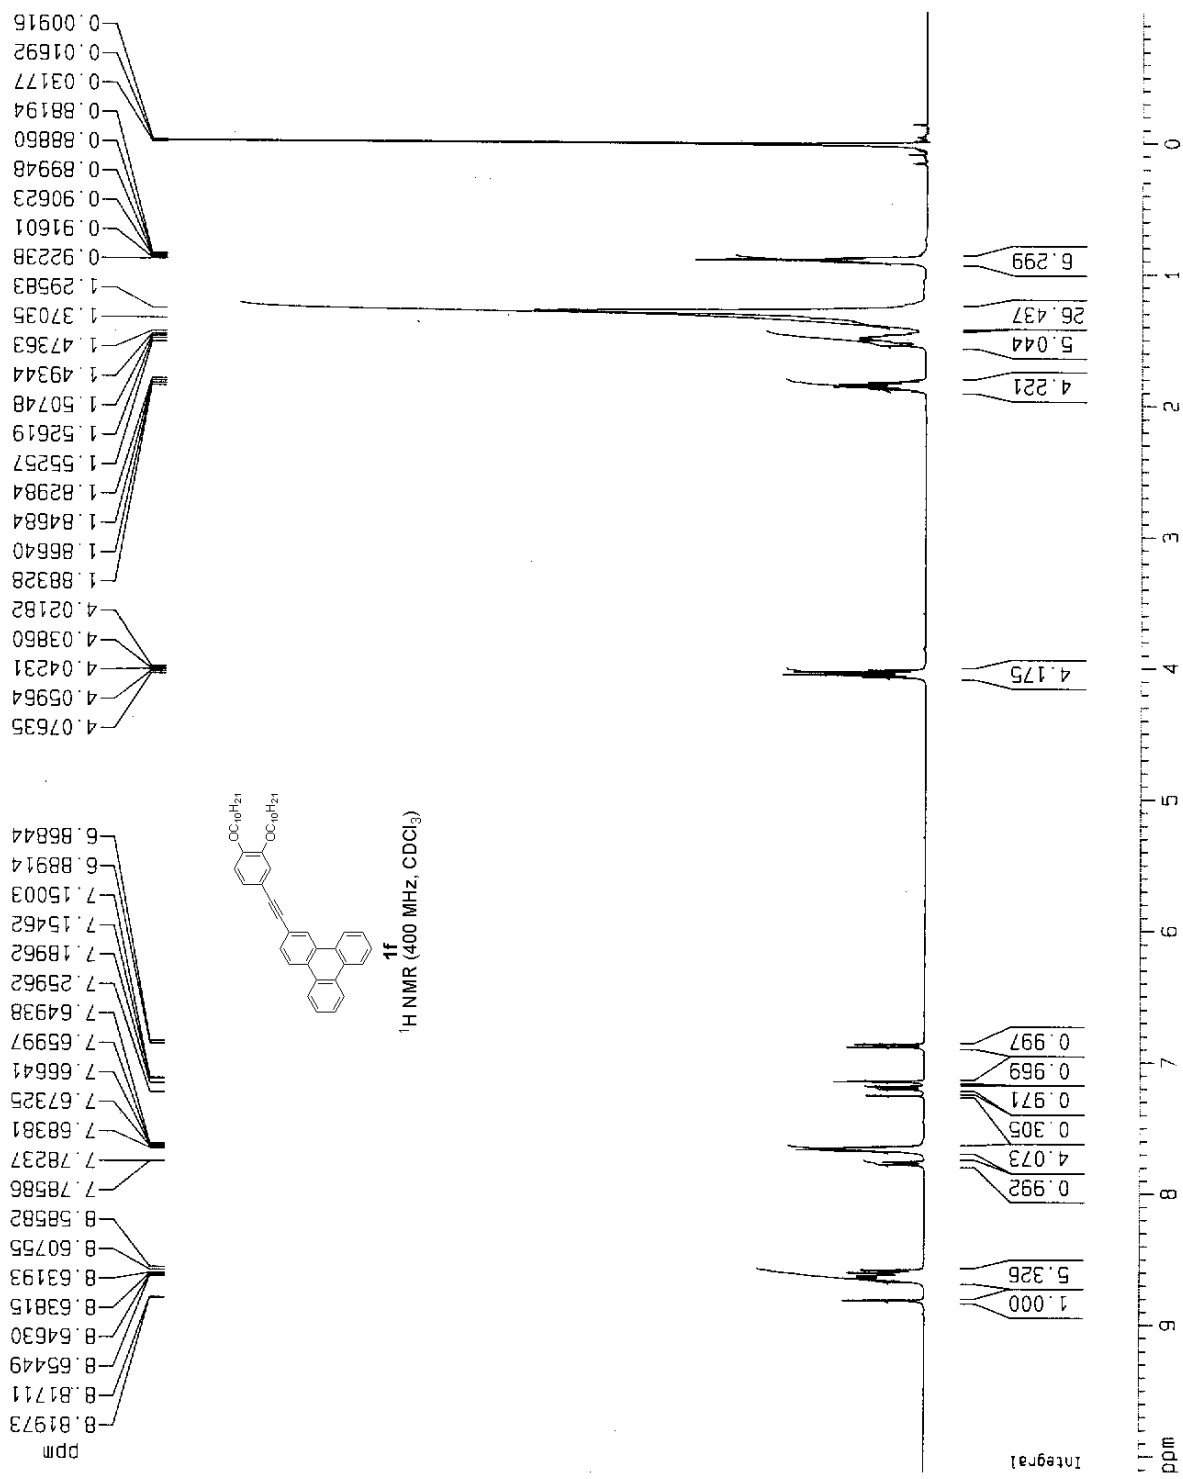

**Figure 18:**  $^1\text{H NMR}$  spectrum of **1f** in  $\text{CDCl}_3$ .



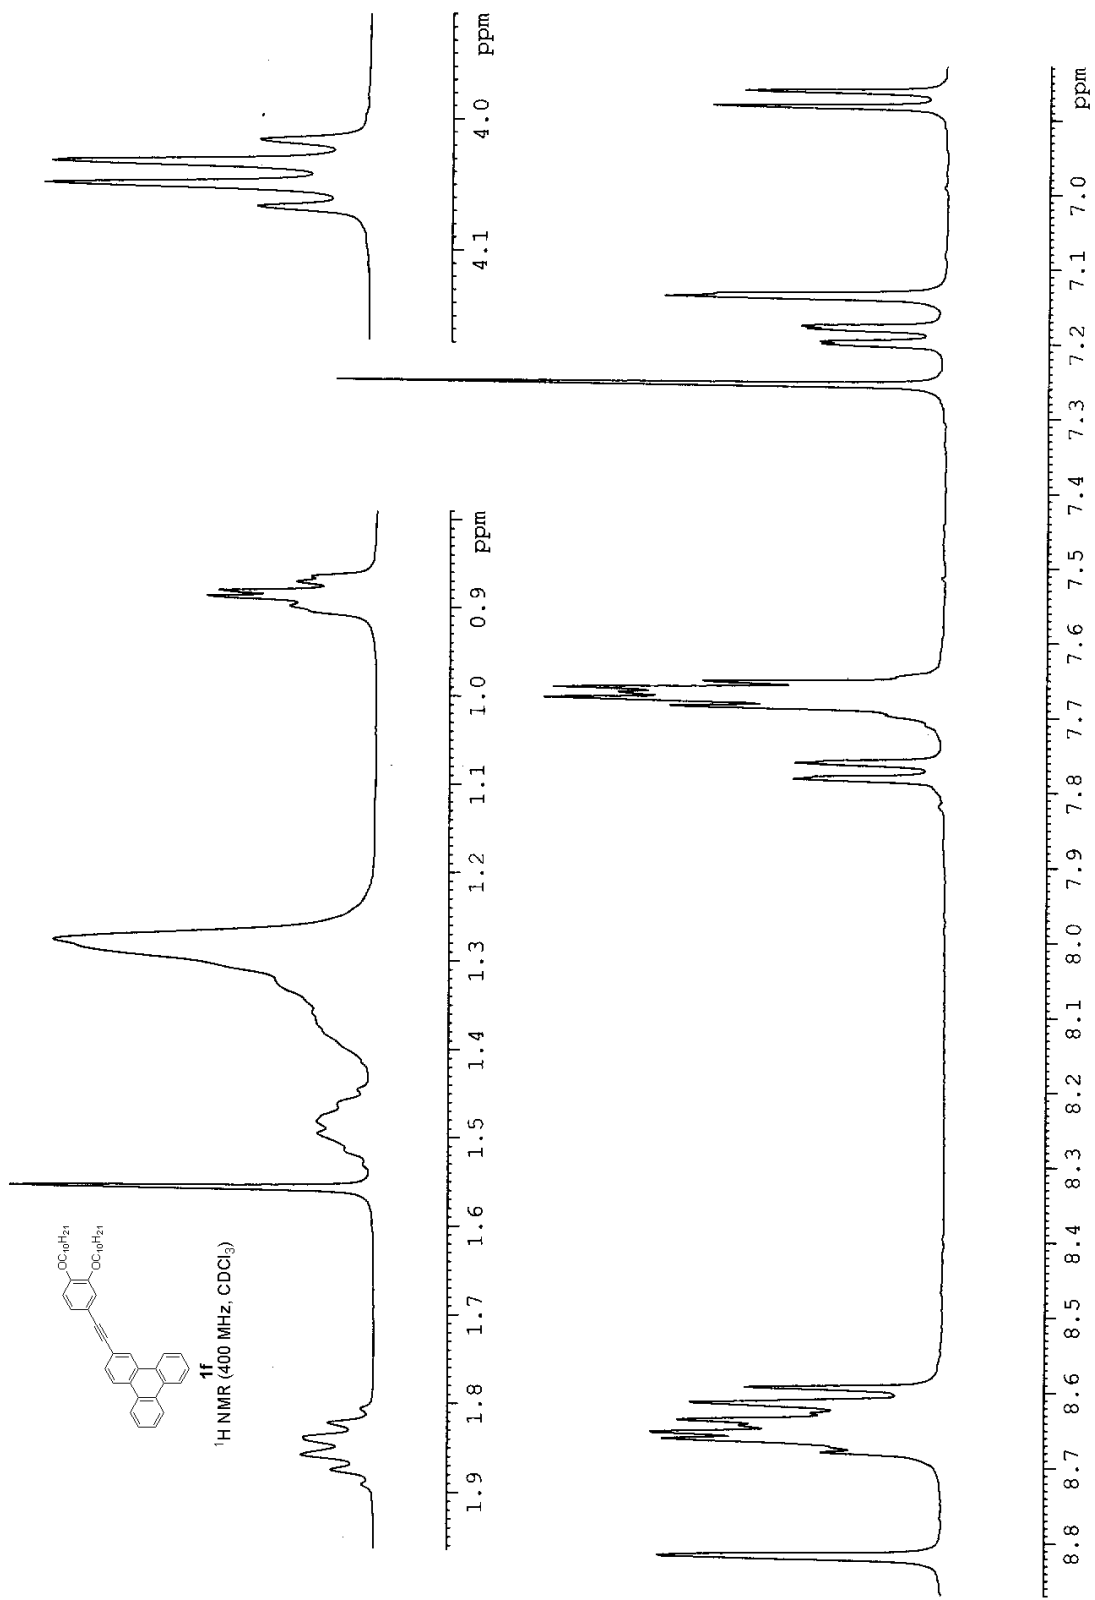

**Figure 19:** Expanded aromatic and aliphatic regions of  $^1\text{H}$  NMR spectrum of **1f** in  $\text{CDCl}_3$ .

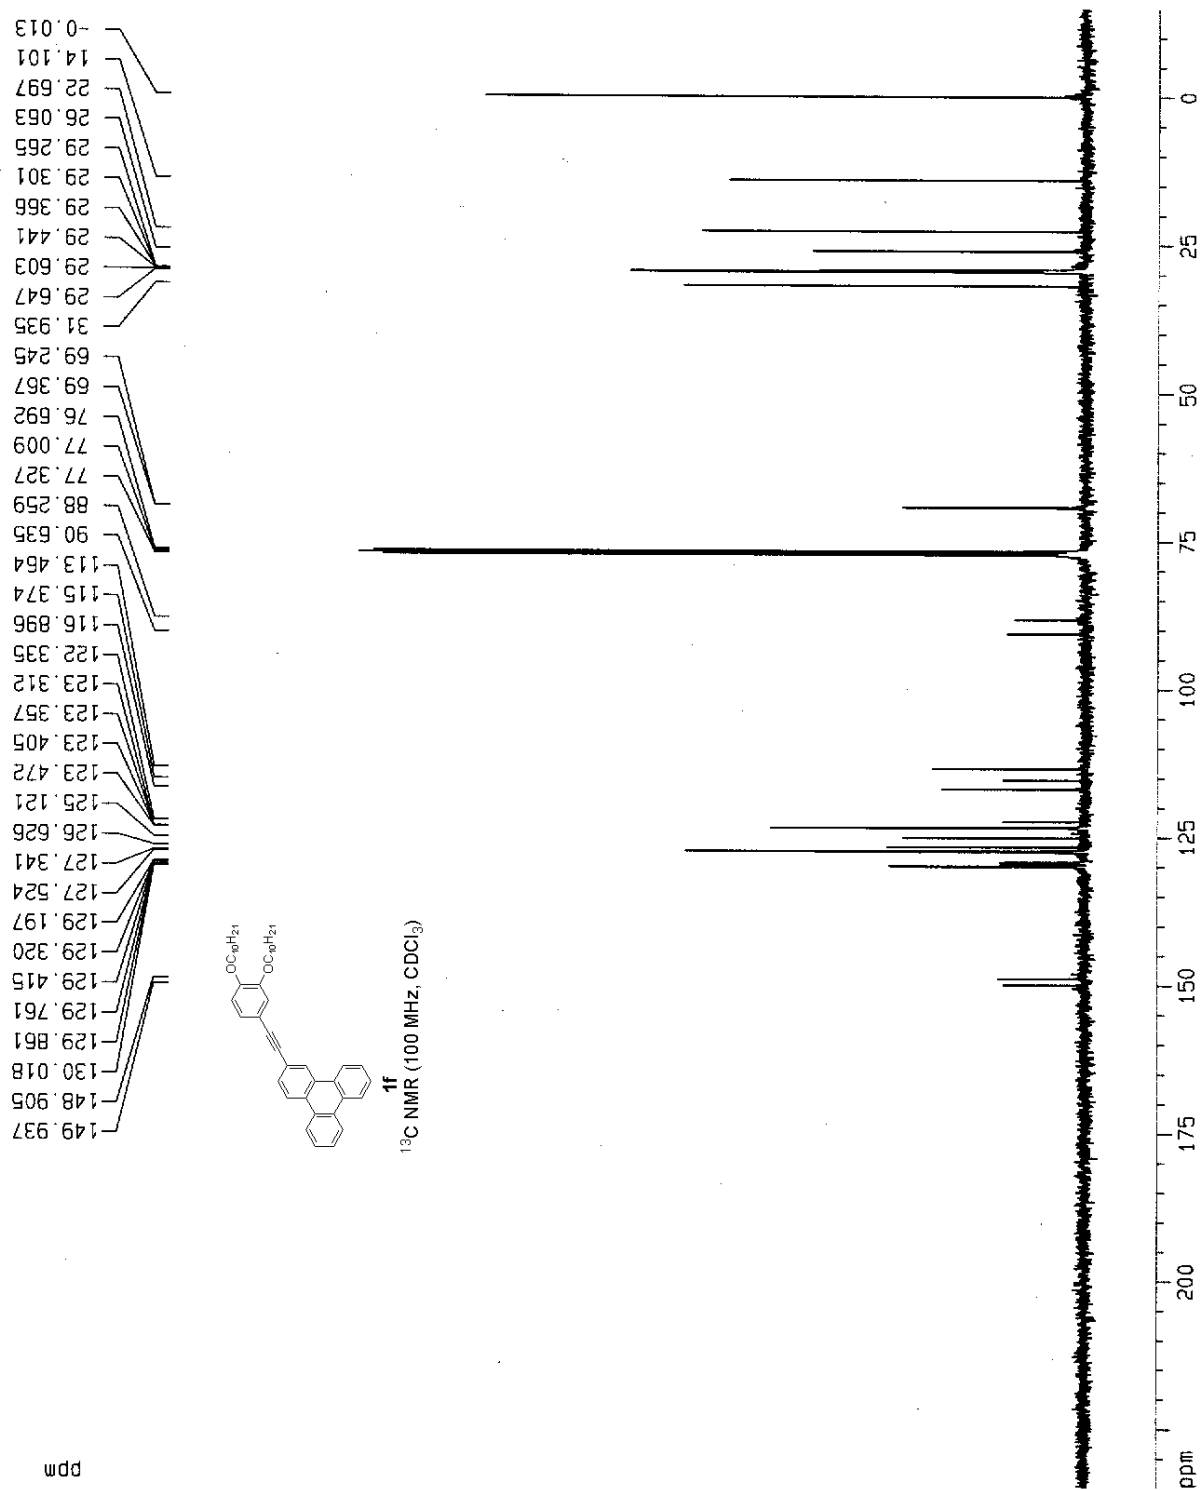

**Figure 20:**  $^{13}\text{C}$  NMR spectrum of **1f** in  $\text{CDCl}_3$ .

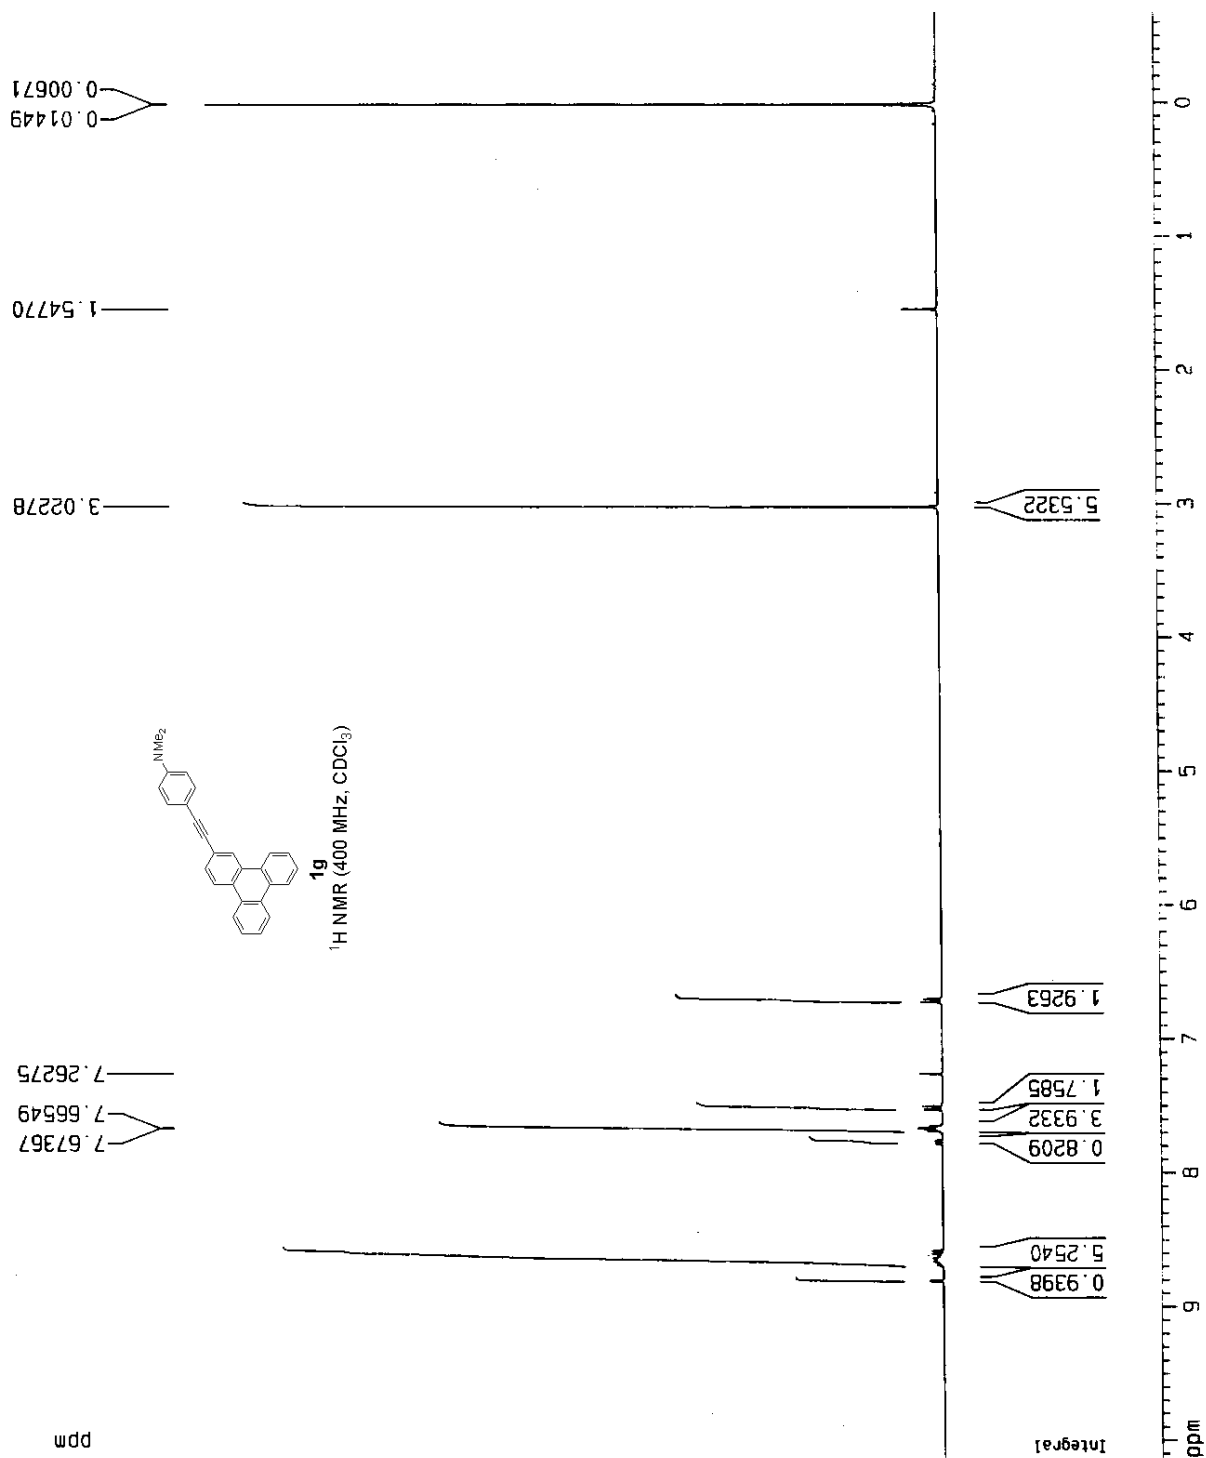

**Figure 21:** <sup>1</sup>H NMR spectrum of **1g** in CDCl<sub>3</sub>.

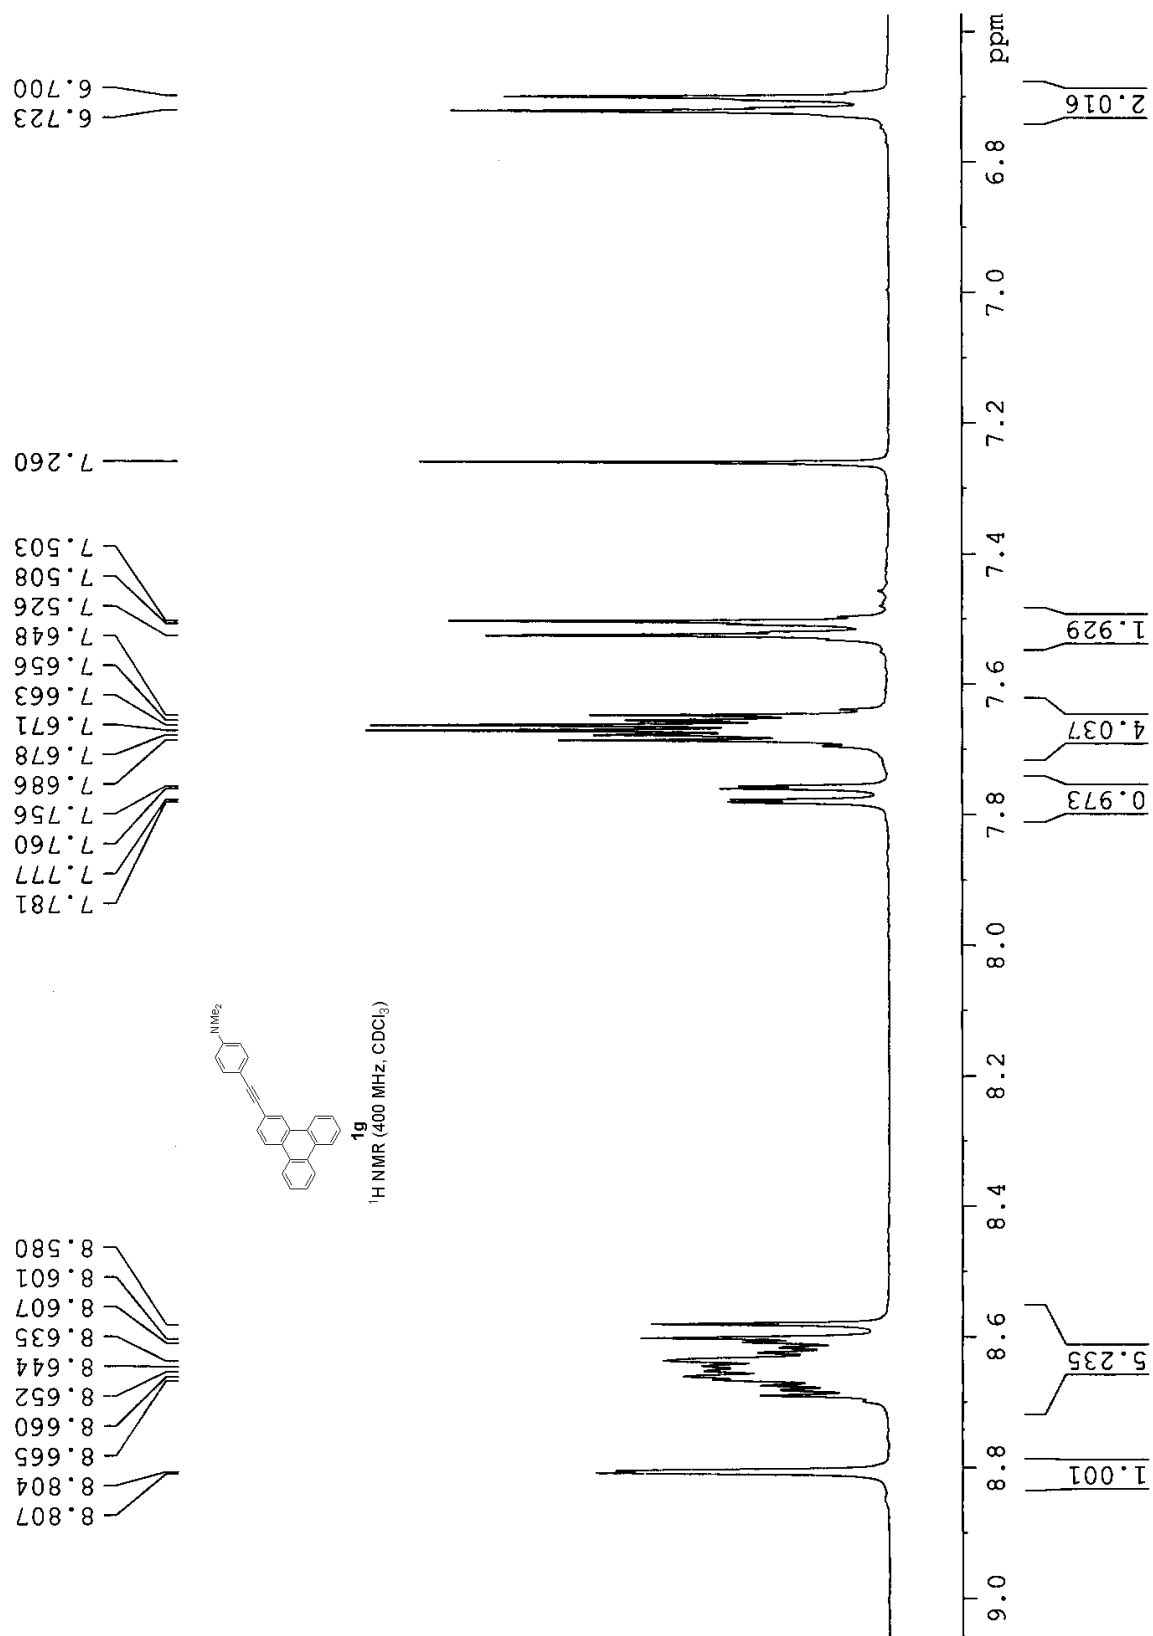

**Figure 22:** Expanded aromatic region of <sup>1</sup>H NMR spectrum of **1g** in CDCl<sub>3</sub>.

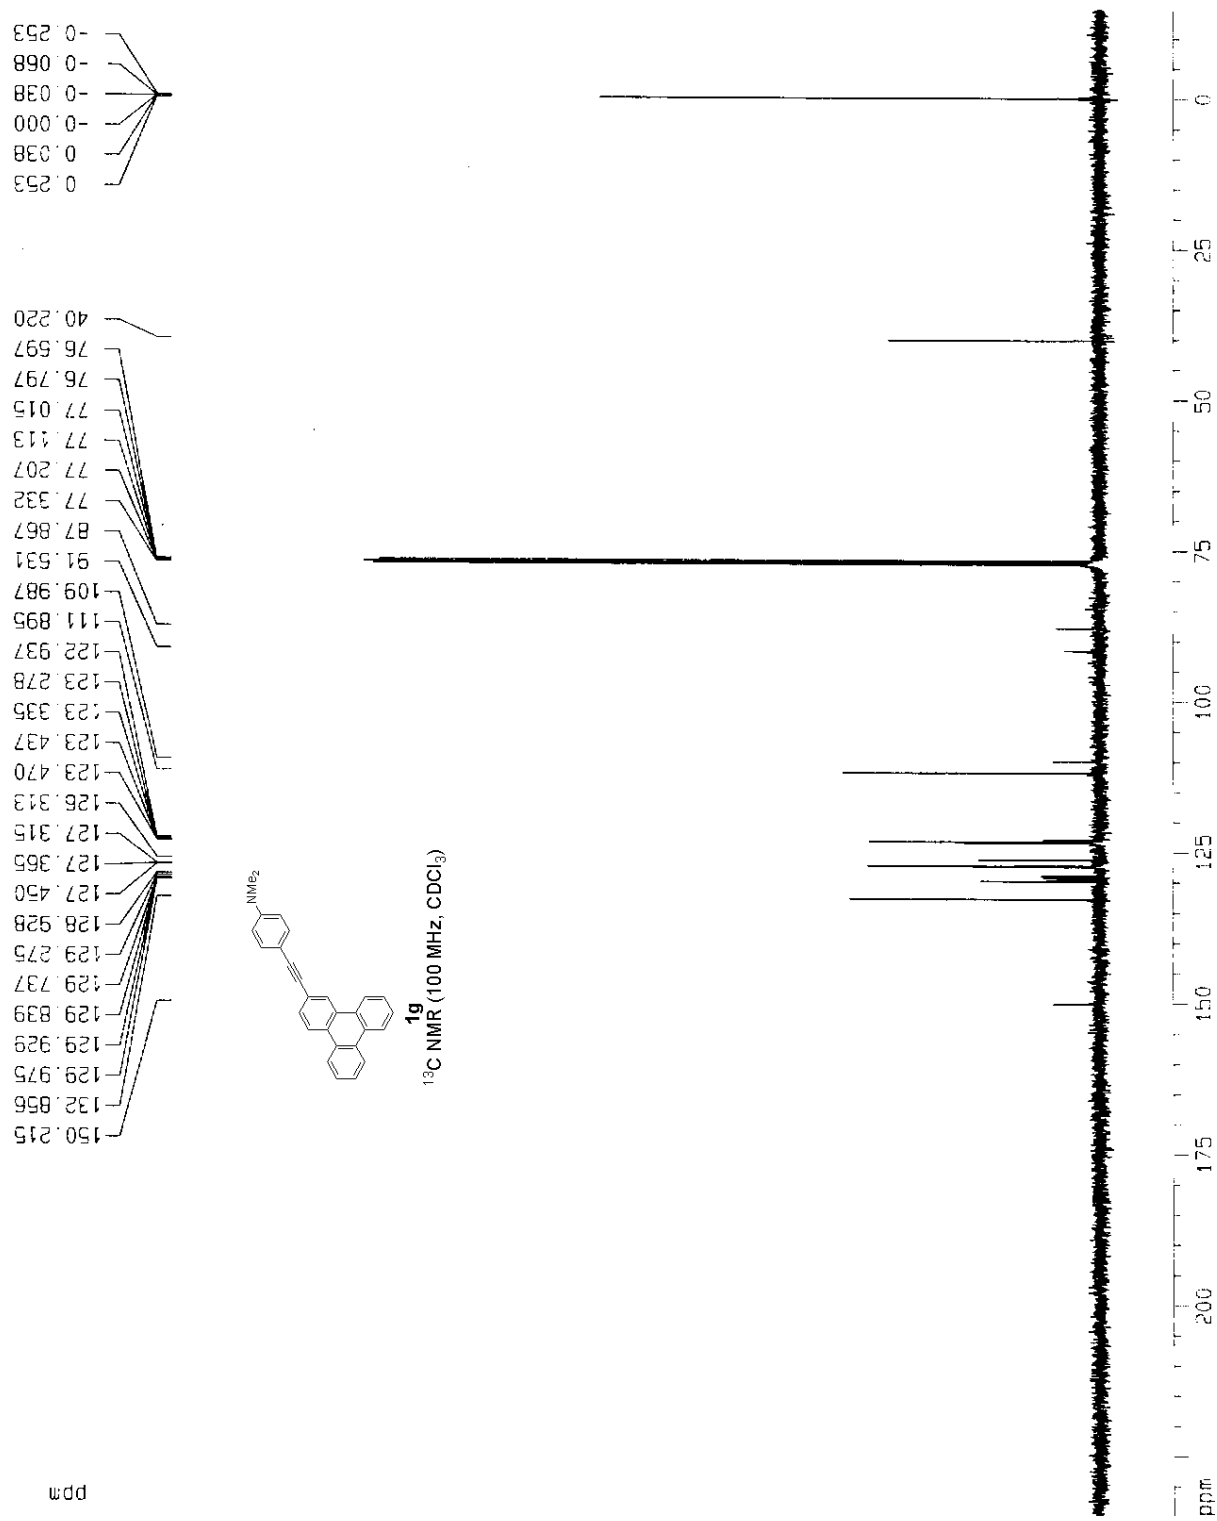

**Figure 23:**  $^{13}\text{C}$  NMR spectrum of **1g** in  $\text{CDCl}_3$ .

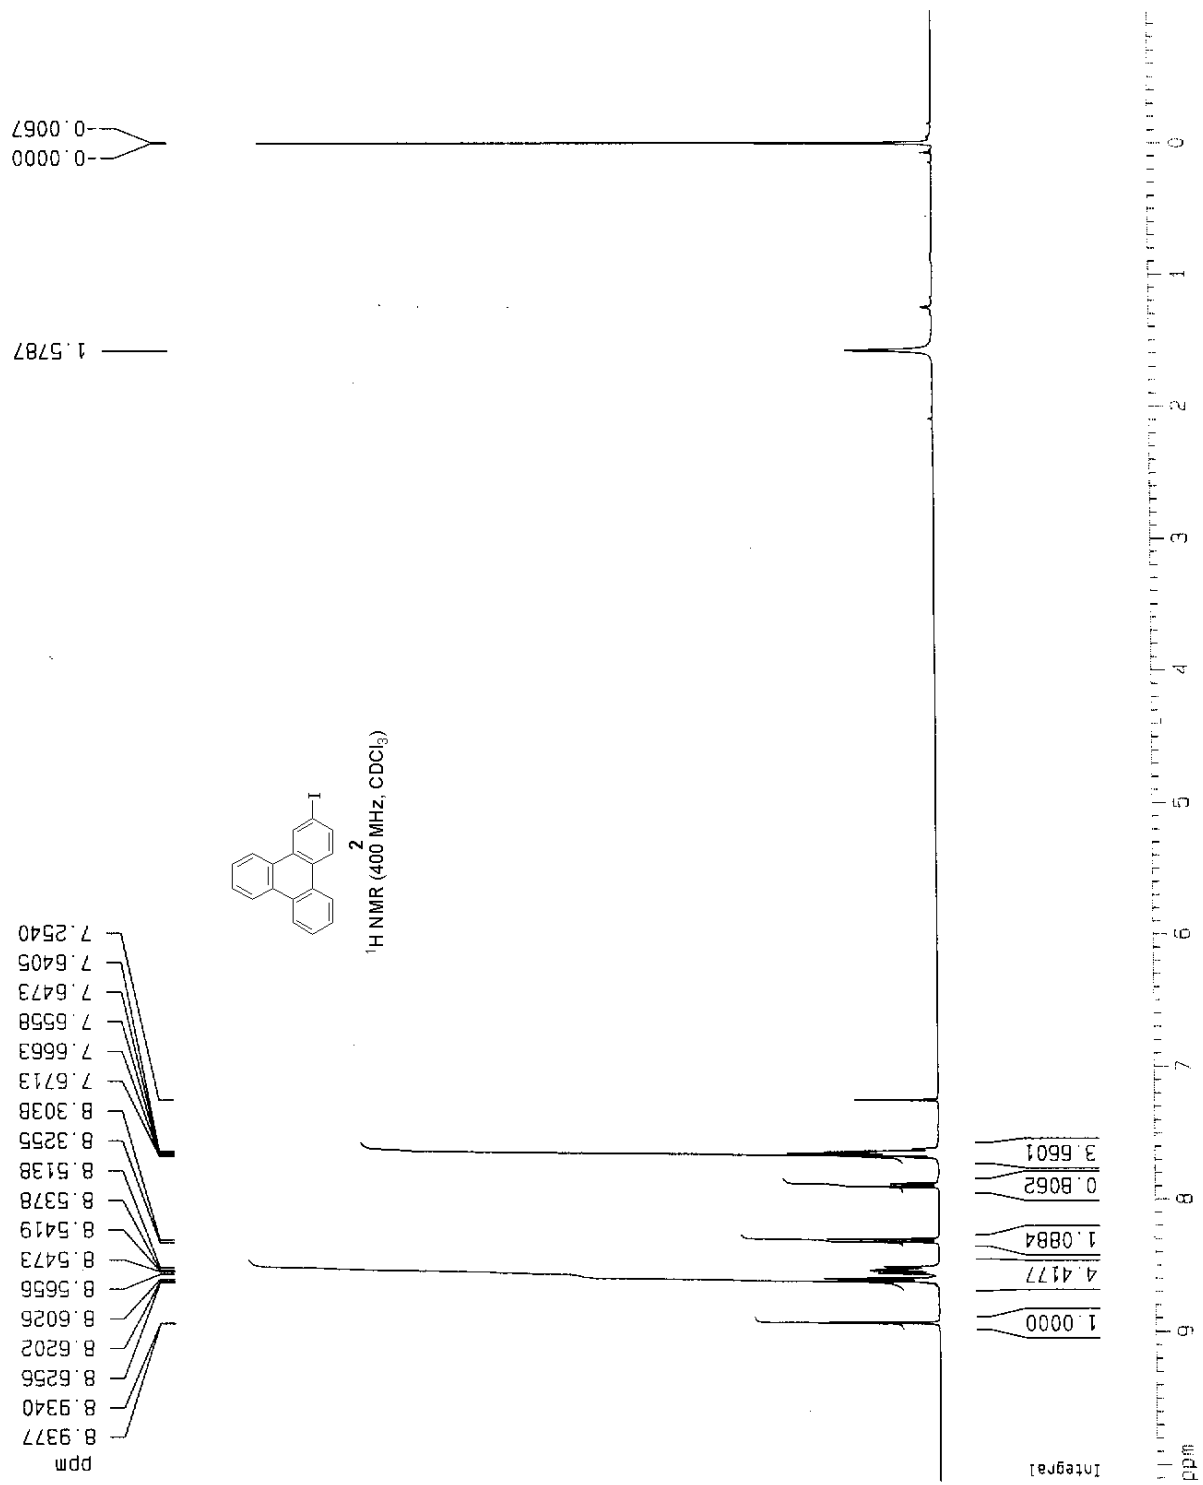

**Figure 24:** <sup>1</sup>H NMR spectrum of **2** in CDCl<sub>3</sub>.

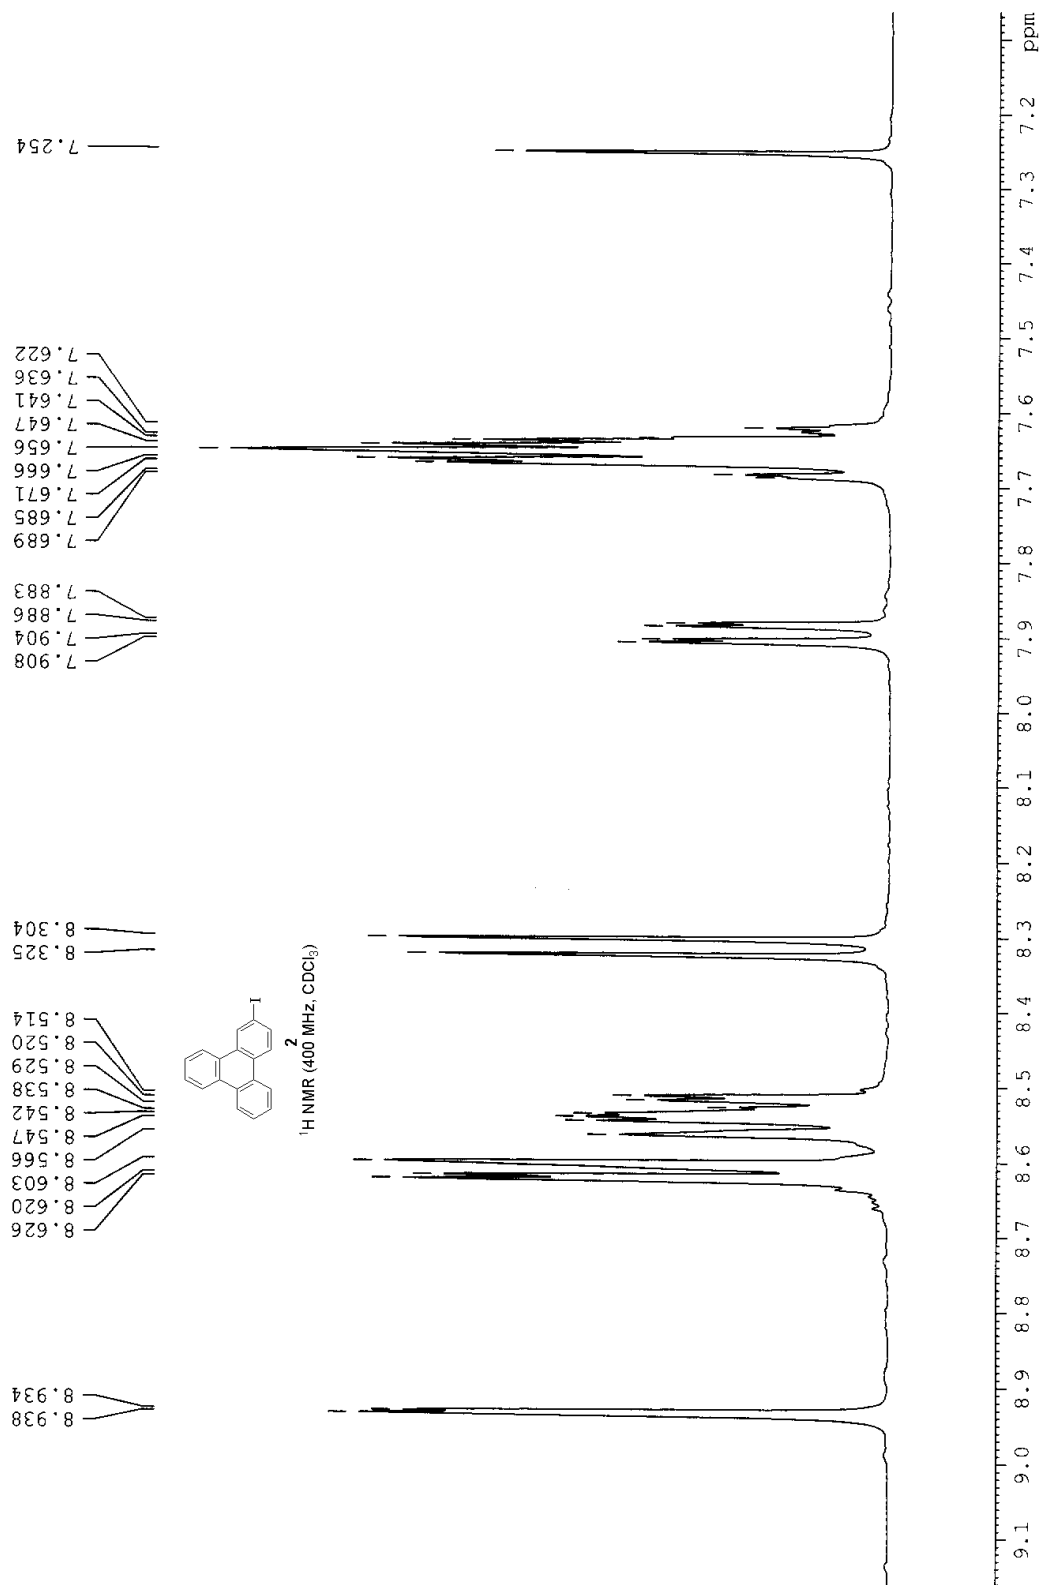

**Figure 25:** Expanded aromatic region of <sup>1</sup>H NMR spectrum of **2** in CDCl<sub>3</sub>.

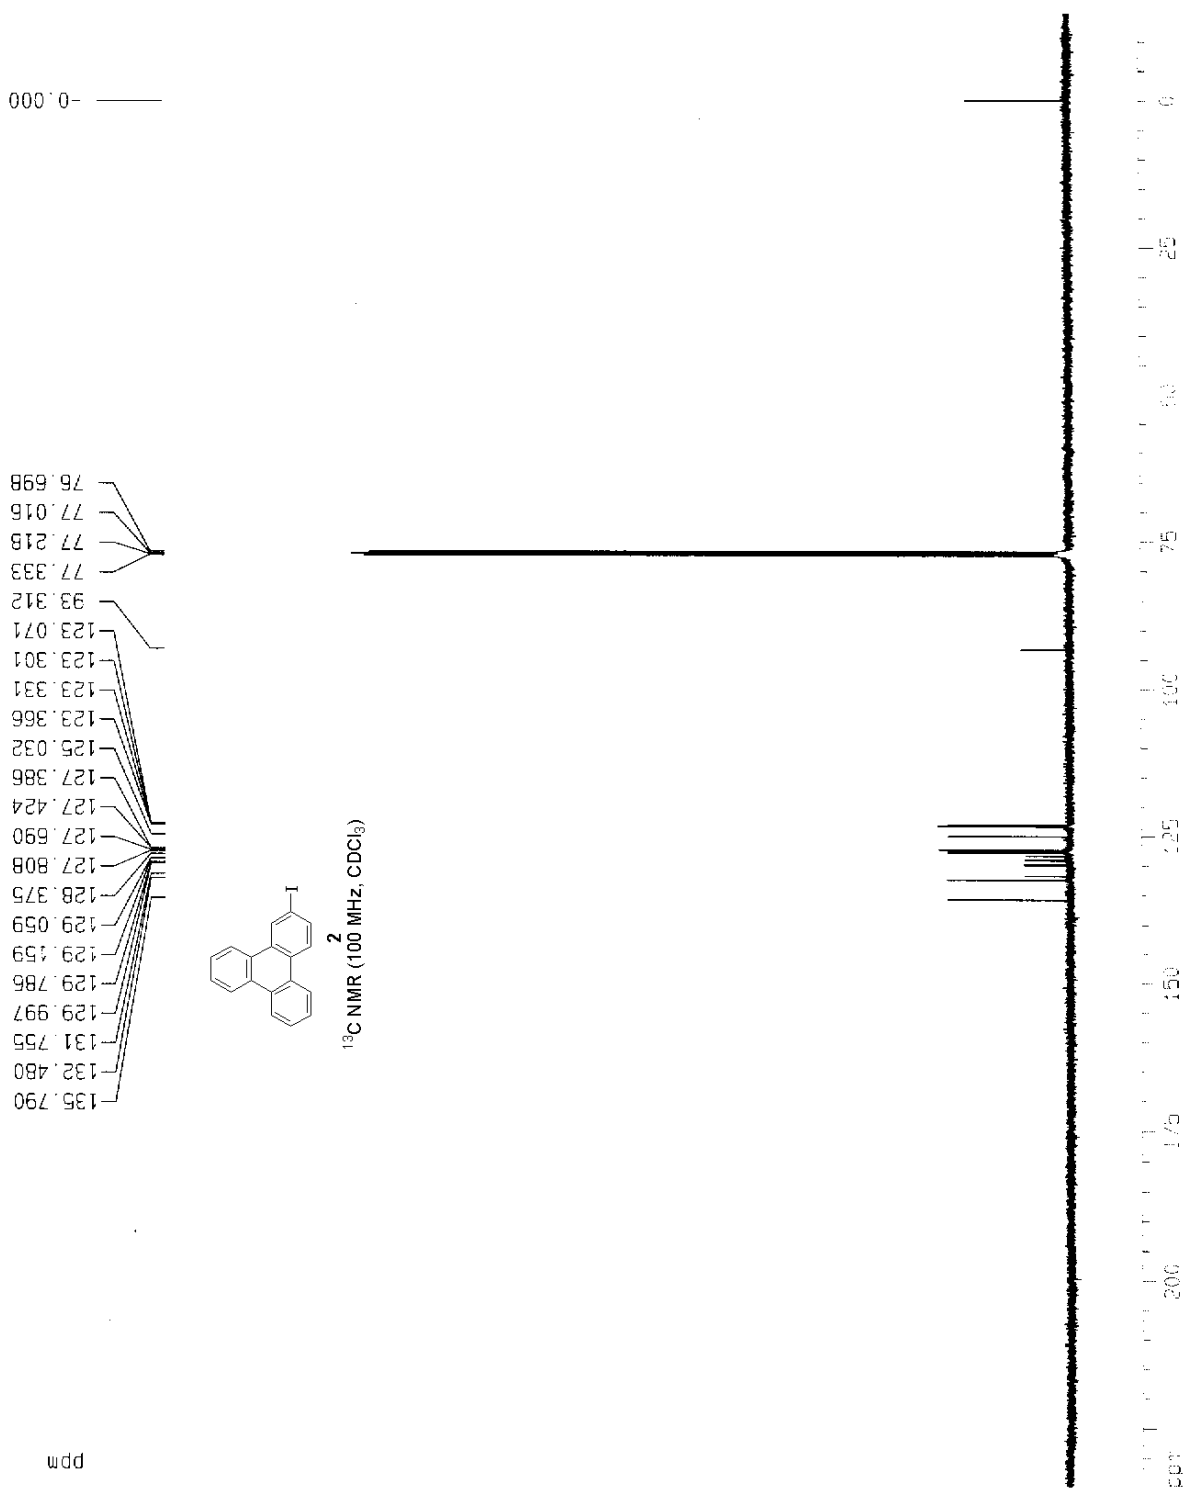

**Figure 26:** <sup>13</sup>C NMR spectrum of **2** in CDCl<sub>3</sub>.



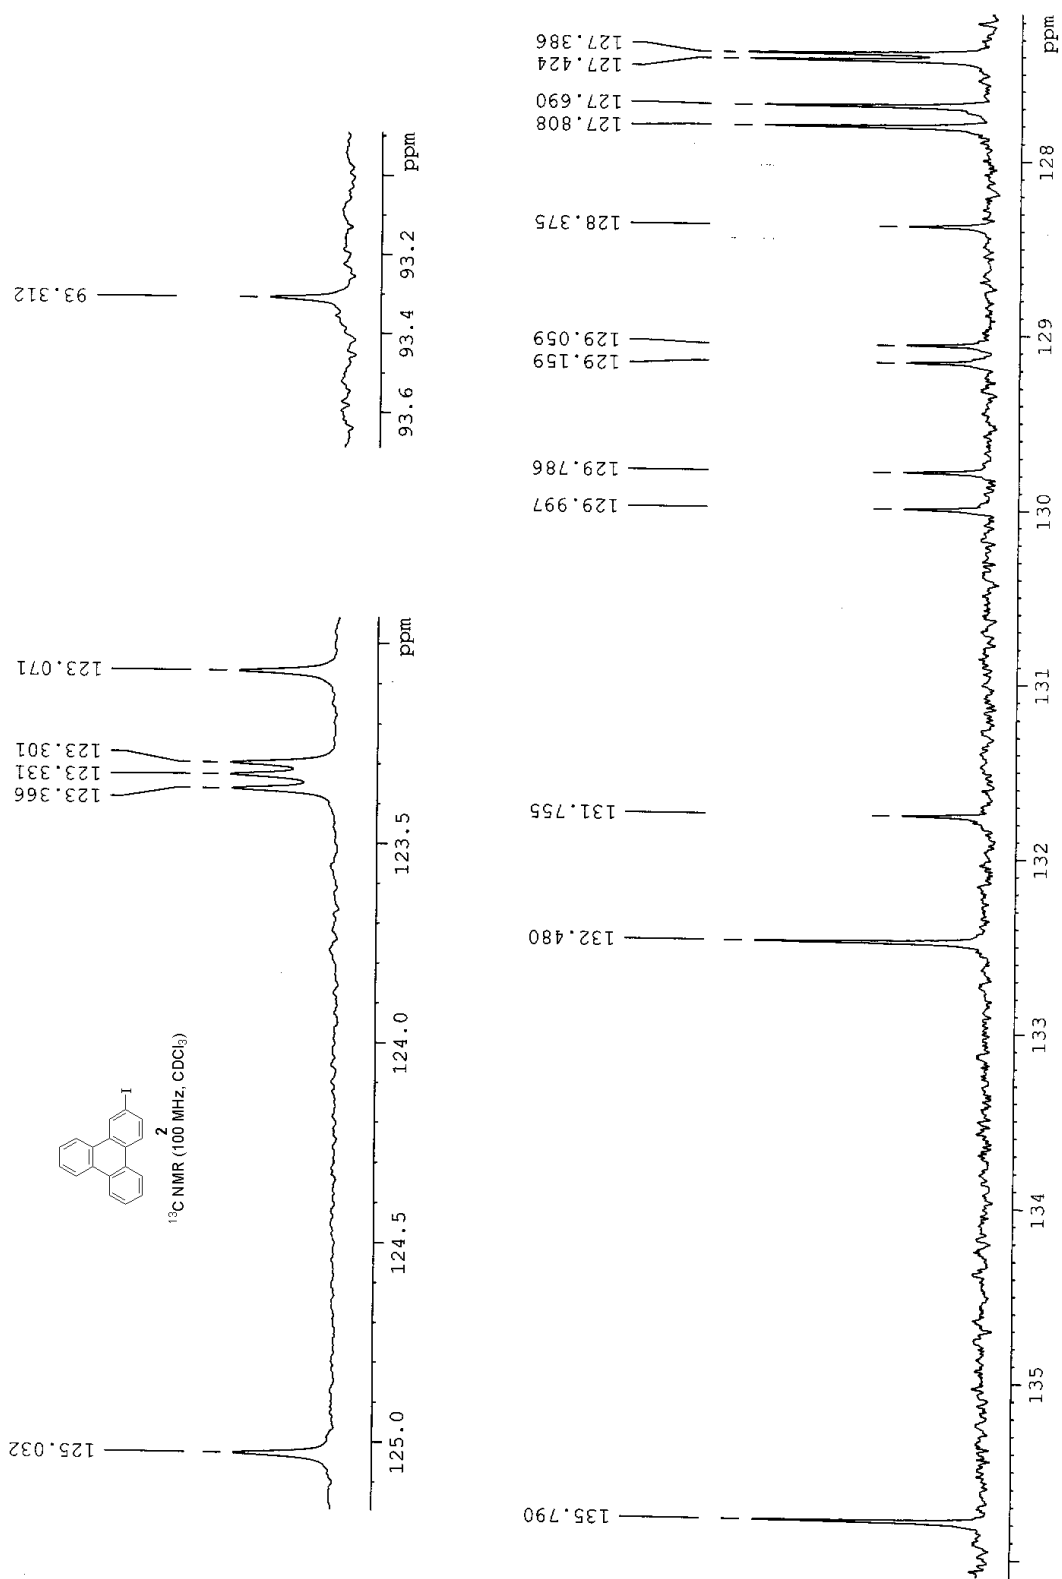

**Figure 27:** Expanded aromatic region of <sup>13</sup>C NMR spectrum of **2** in CDCl<sub>3</sub>.

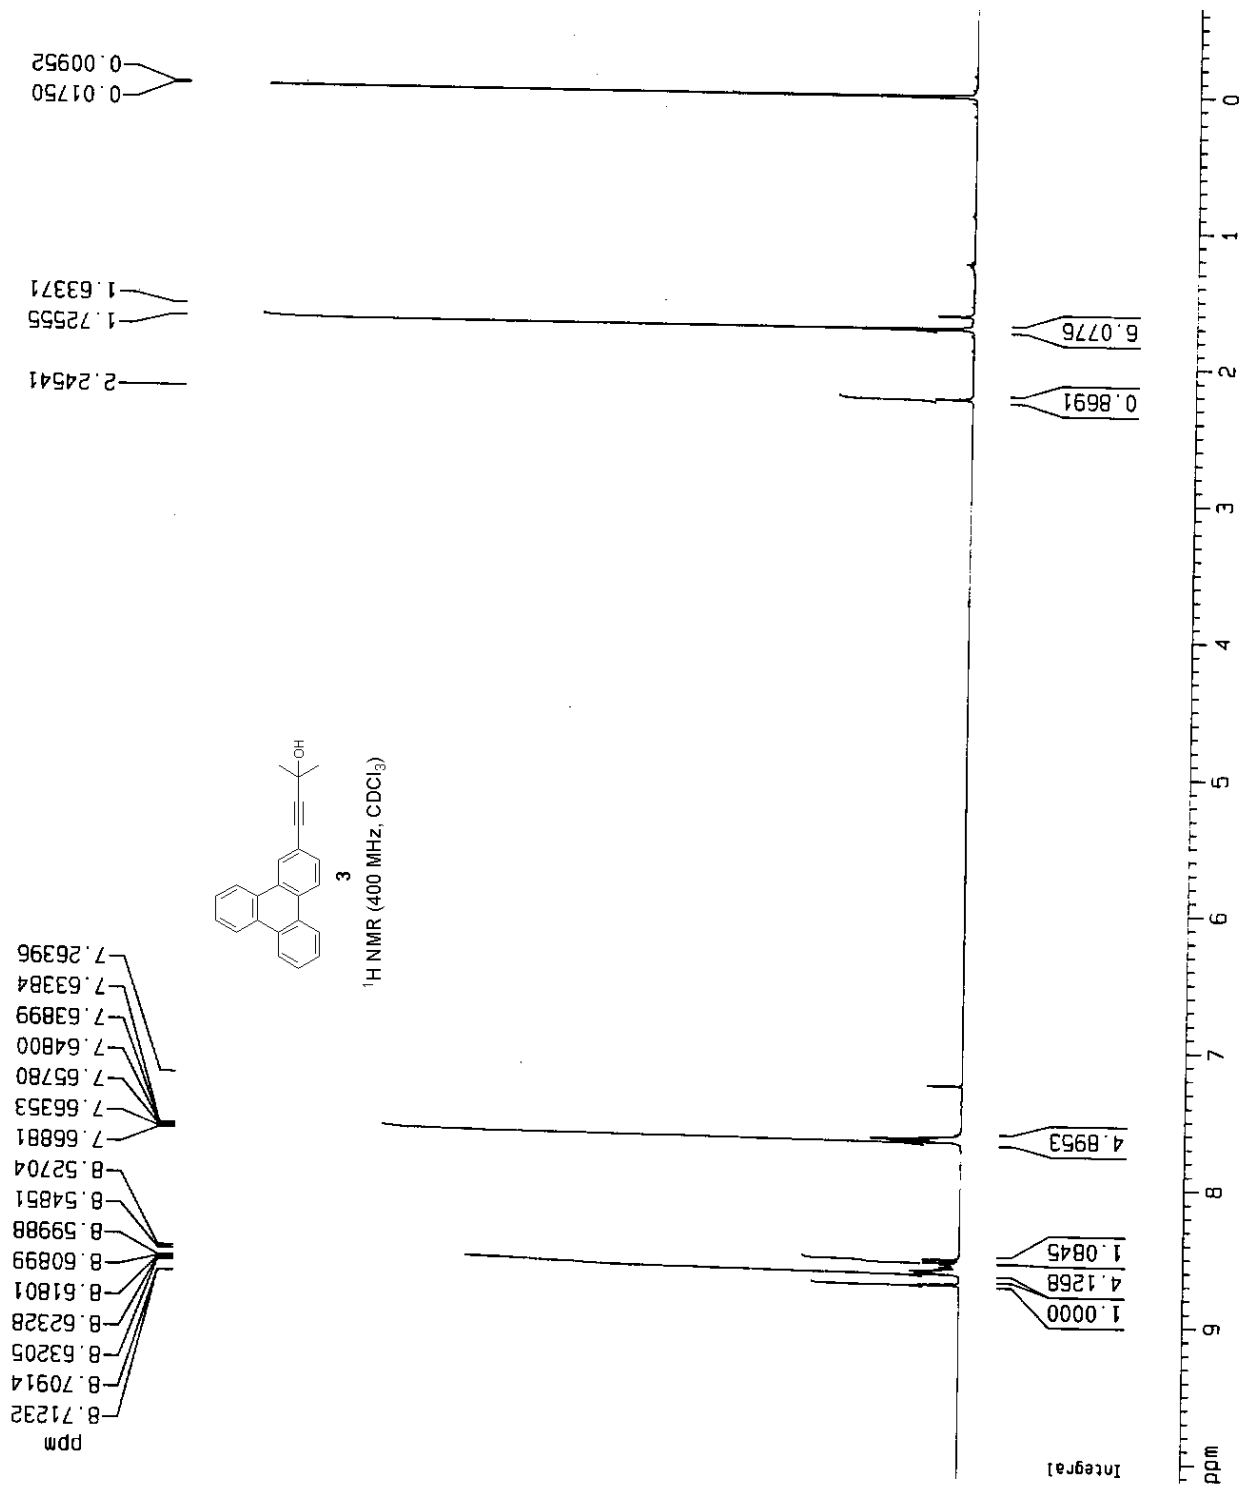

**Figure 28:**  $^1\text{H}$  NMR spectrum of **3** in  $\text{CDCl}_3$ .

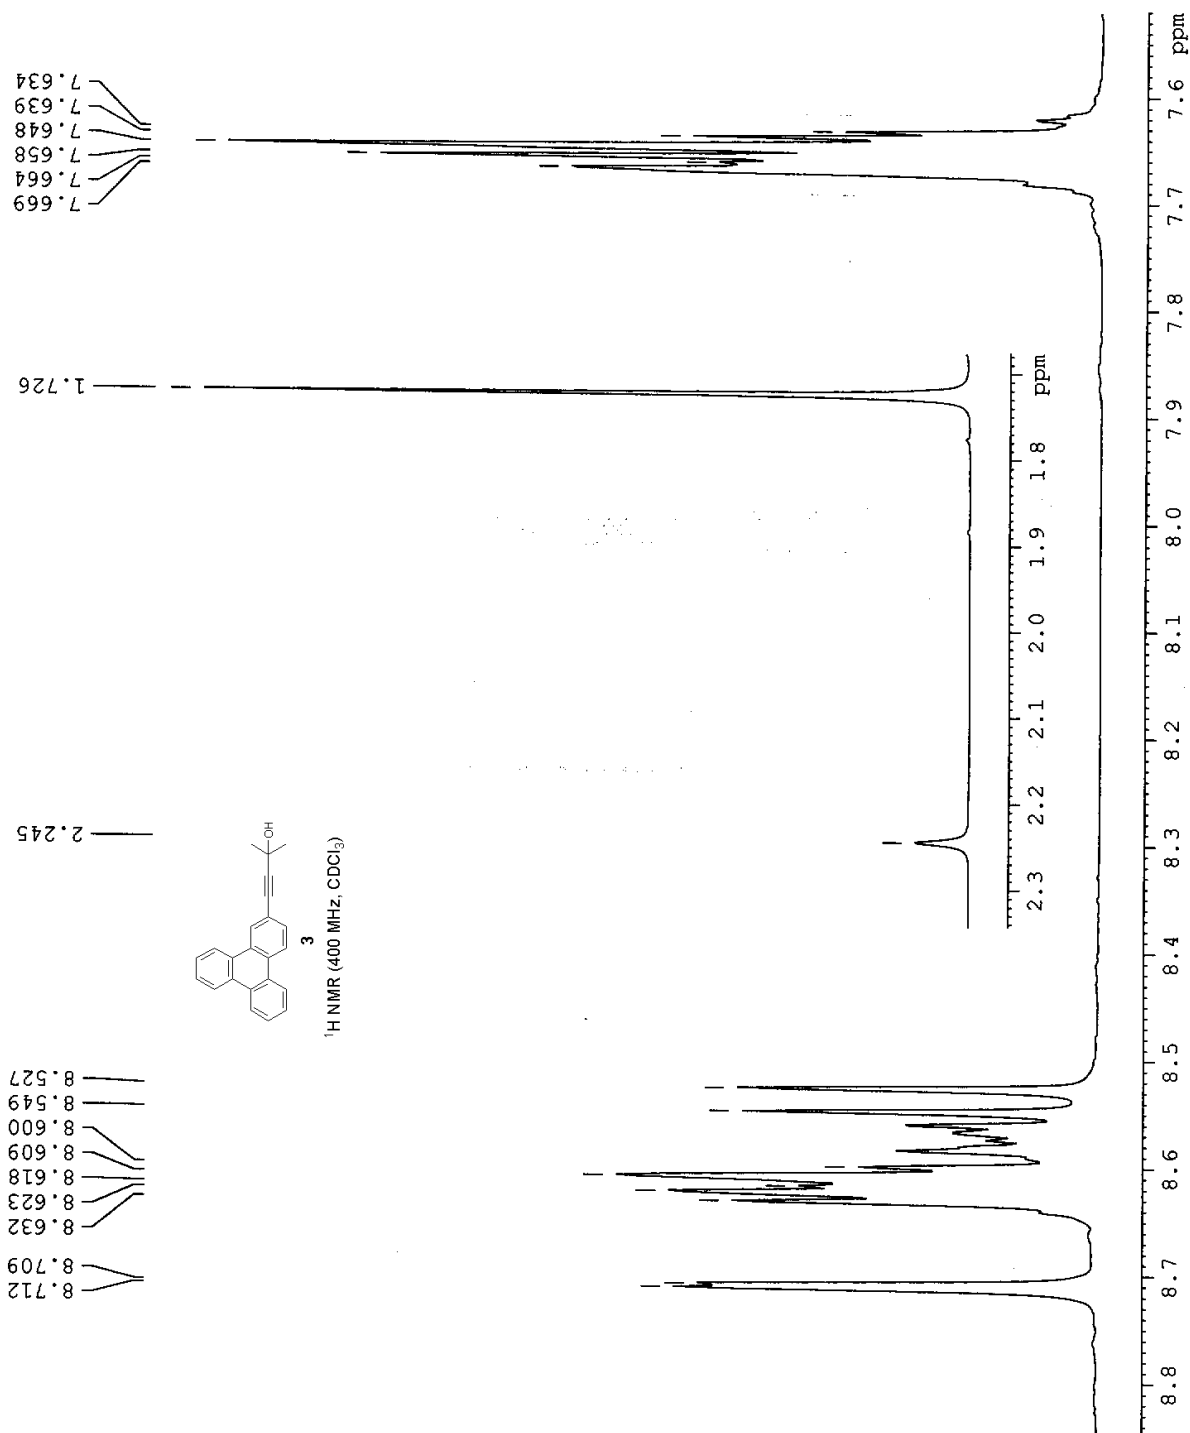

**Figure 29:** Expanded aromatic region of  $^1\text{H NMR}$  spectrum of **3** in  $\text{CDCl}_3$ .

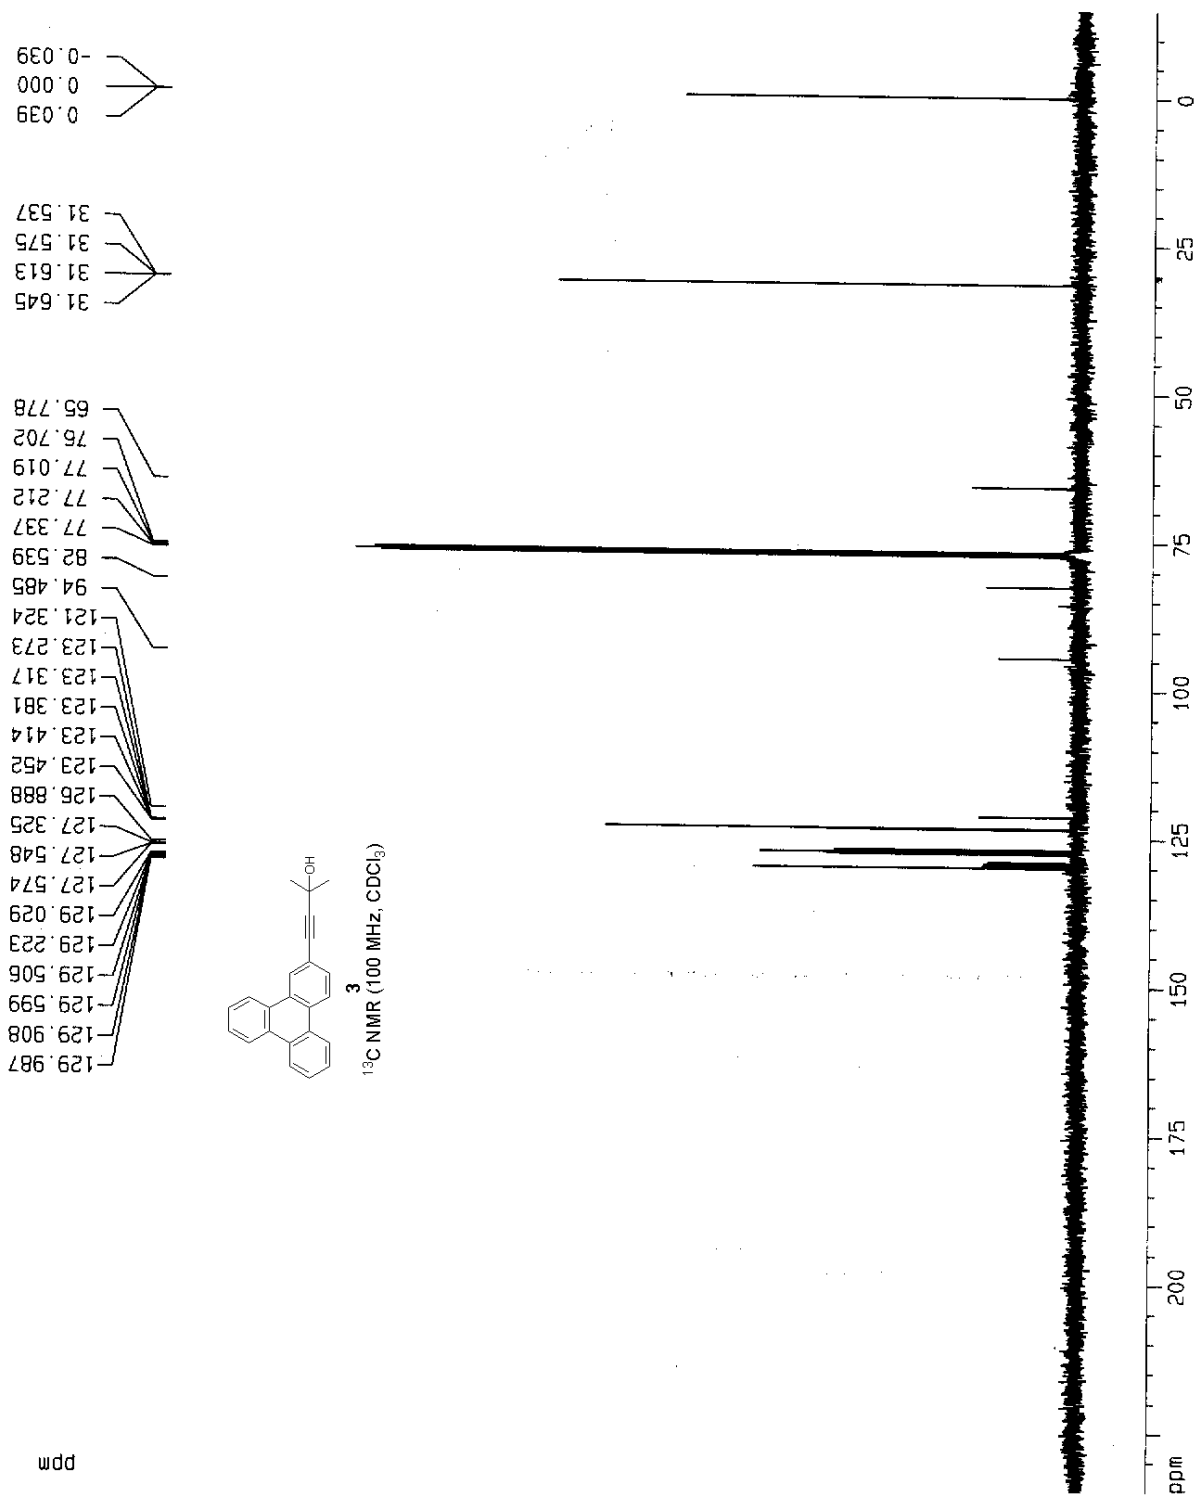

**Figure 30:** <sup>13</sup>C NMR spectrum of **3** in CDCl<sub>3</sub>.

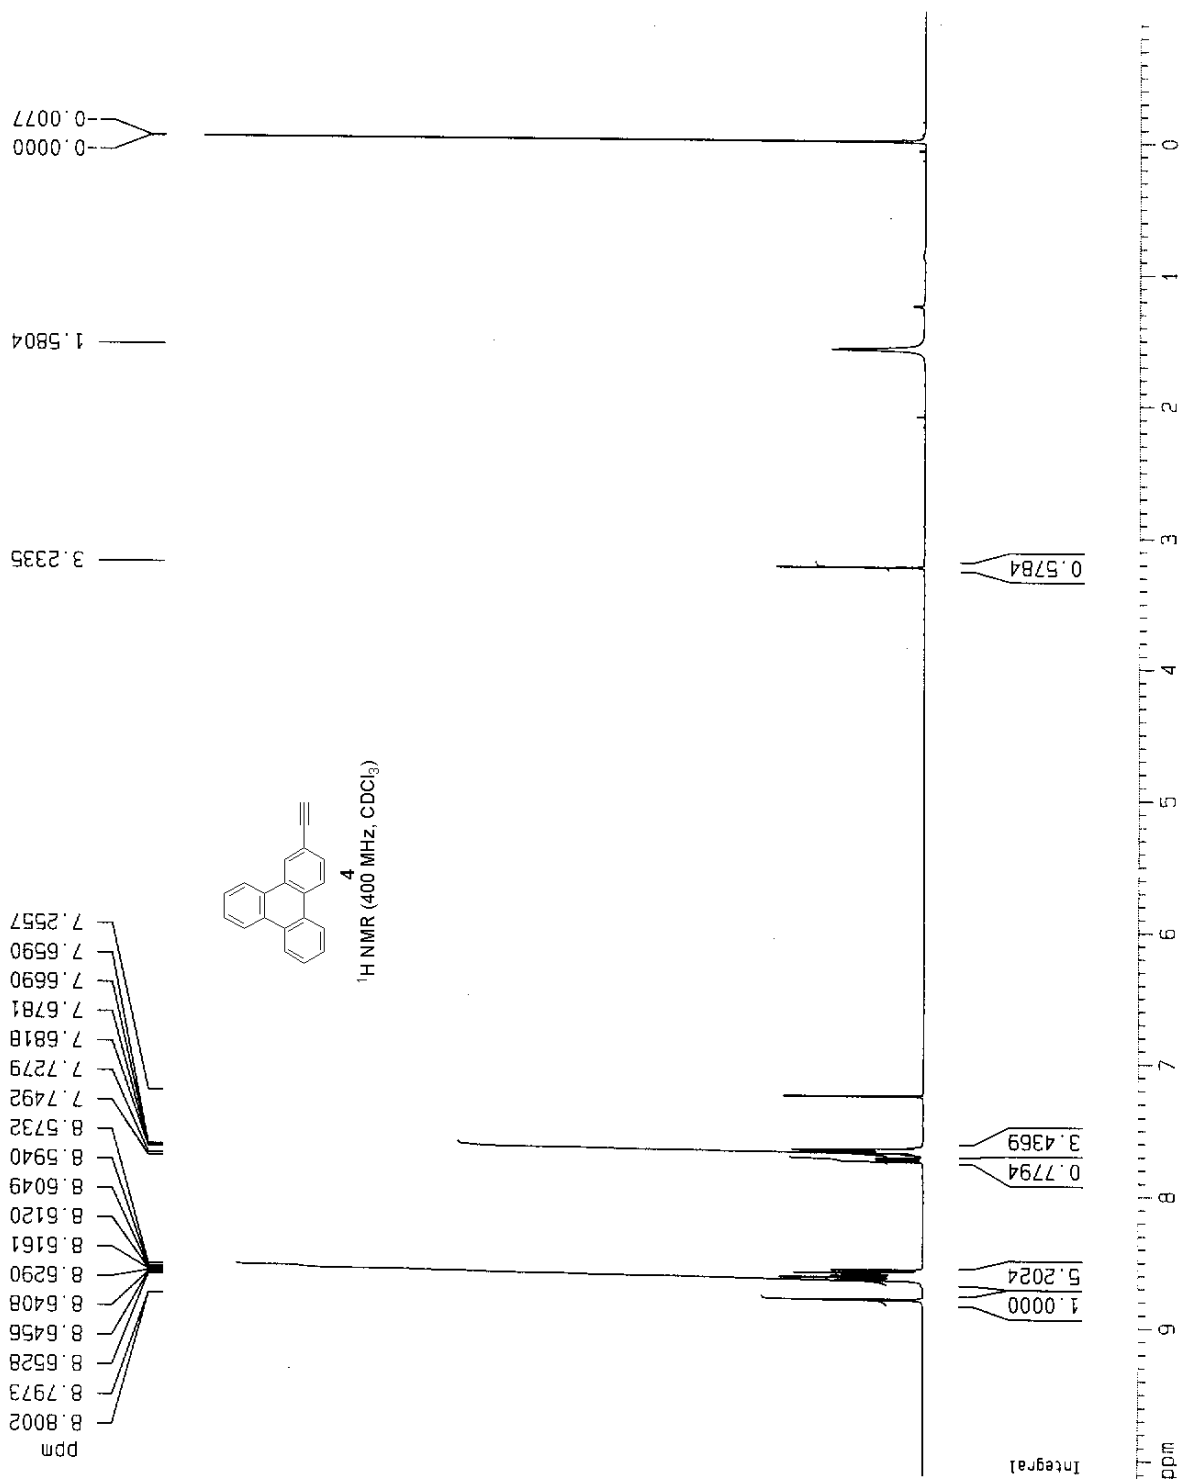

**Figure 31:**  $^1\text{H}$  NMR spectrum of **4** in  $\text{CDCl}_3$ .

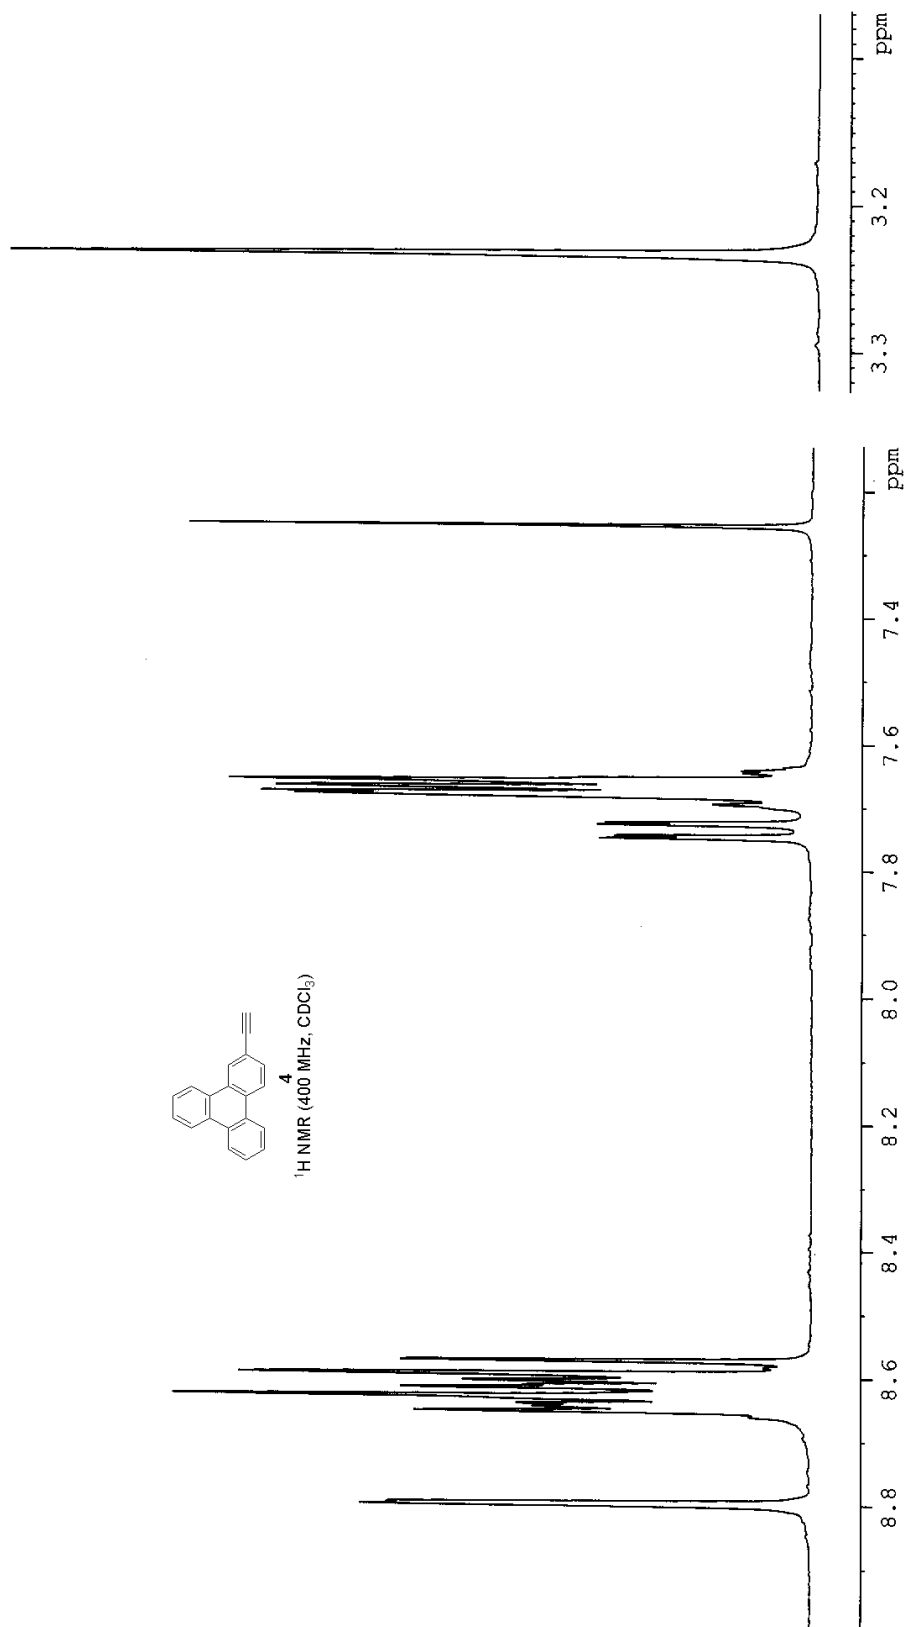

**Figure 32:** Expanded aromatic region of  $^1\text{H}$  NMR spectrum of **4** in  $\text{CDCl}_3$ .

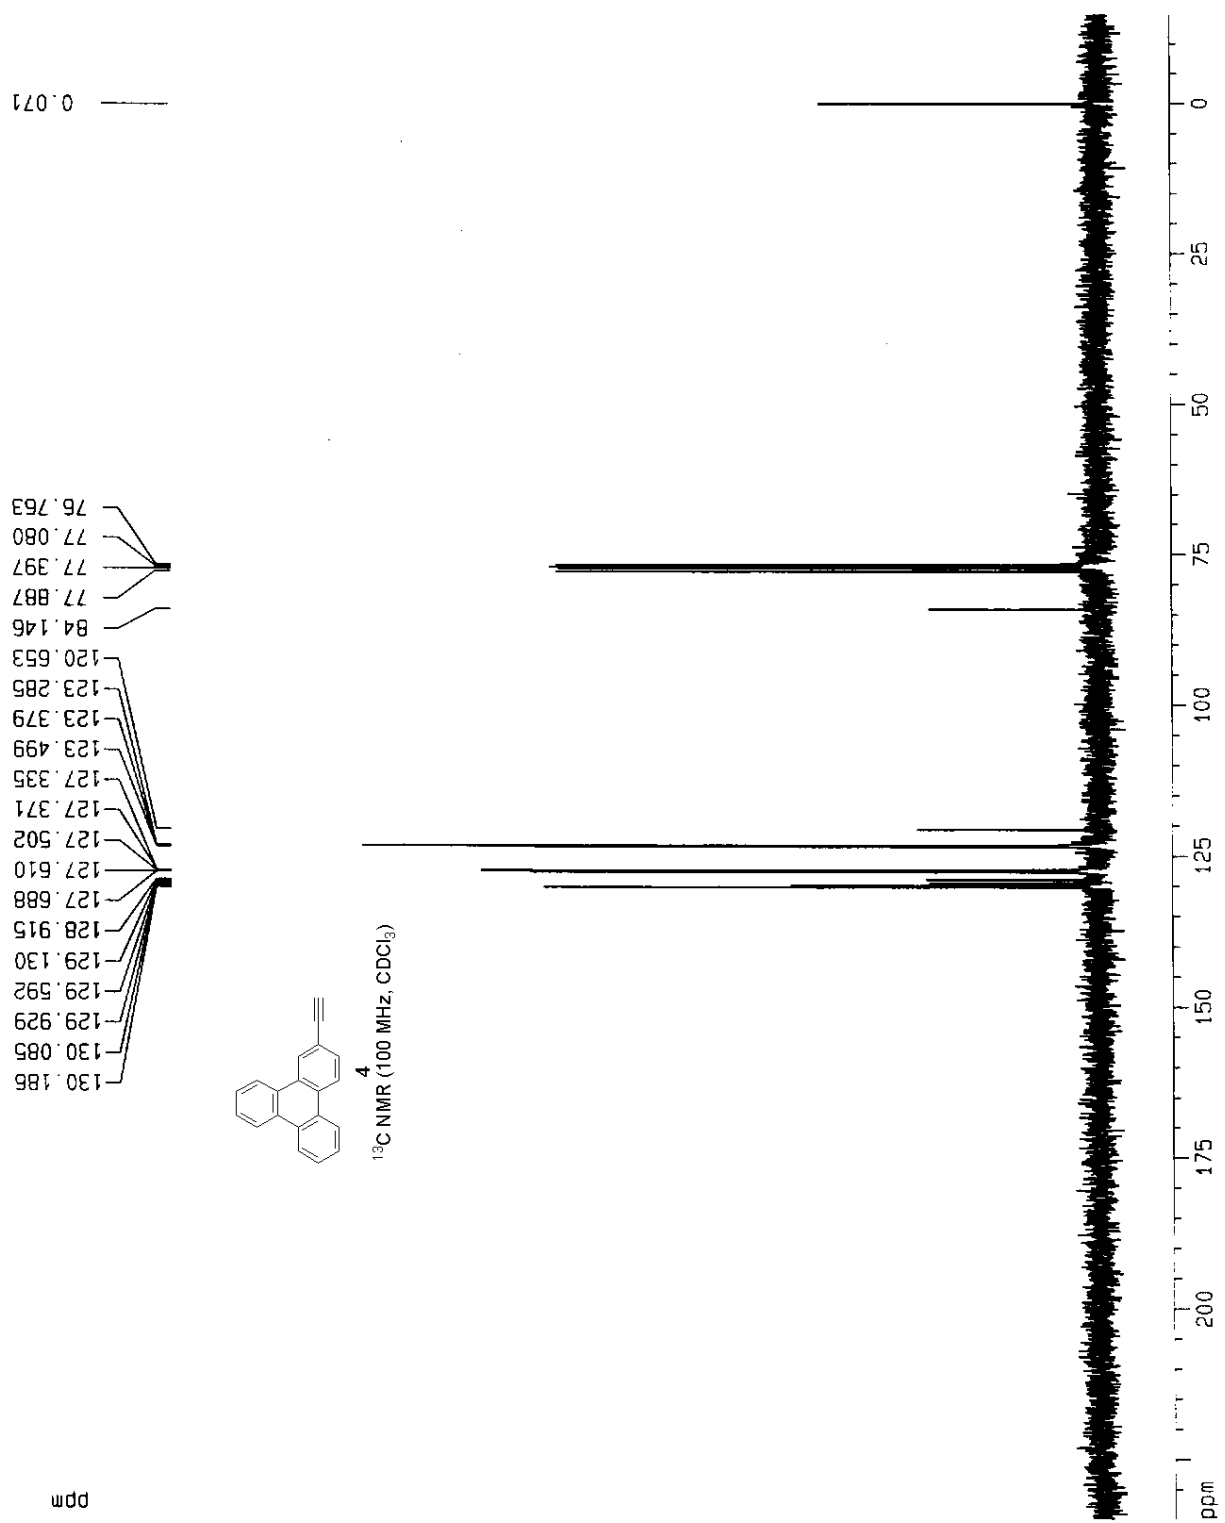

**Figure 33:** <sup>13</sup>C NMR spectrum of **4** in CDCl<sub>3</sub>.

Calculations were performed using PC Spartan Pro Version 1.1 program (Wavefunction, Inc., Irvine, CA). DFT method using SVWN/DN\* basis set was used to obtain the optimized geometries and HOMO-LUMO surfaces.

Coordinates for Compound **1c**.

|       |       | Cartesian Coordinates (Angstroms) |           |            |
|-------|-------|-----------------------------------|-----------|------------|
| Atom  |       | X                                 | Y         | Z          |
| ----- |       | -----                             | -----     | -----      |
| 1     | H H1  | -3.6968730                        | 0.0000000 | 3.4443294  |
| 2     | C C1  | -4.3370015                        | 0.0000000 | 2.5578499  |
| 3     | C C2  | -5.9995252                        | 0.0000000 | 0.3650627  |
| 4     | C C3  | -3.7613125                        | 0.0000000 | 1.2793262  |
| 5     | C C4  | -5.6994214                        | 0.0000000 | 2.7384899  |
| 6     | C C5  | -6.5417825                        | 0.0000000 | 1.6296128  |
| 7     | C C6  | -4.6149601                        | 0.0000000 | 0.1546225  |
| 8     | H H3  | -6.1181602                        | 0.0000000 | 3.7508865  |
| 9     | H H4  | -7.6296020                        | 0.0000000 | 1.7596379  |
| 10    | H H6  | -6.6778072                        | 0.0000000 | -0.4926710 |
| 11    | C C7  | -2.3296664                        | 0.0000000 | 1.0960825  |
| 12    | C C8  | 0.4680835                         | 0.0000000 | 0.7431860  |
| 13    | C C9  | -1.4505403                        | 0.0000000 | 2.1893029  |
| 14    | C C10 | -1.7793795                        | 0.0000000 | -0.2055253 |
| 15    | C C11 | -0.3915774                        | 0.0000000 | -0.3482540 |
| 16    | C C12 | -0.0902785                        | 0.0000000 | 2.0331289  |
| 17    | H H8  | -1.8491105                        | 0.0000000 | 3.2072697  |
| 18    | H H10 | 0.0581810                         | 0.0000000 | -1.3445957 |
| 19    | H H11 | 0.5722642                         | 0.0000000 | 2.9050023  |
| 20    | C C13 | -2.6550366                        | 0.0000000 | -1.3622005 |
| 21    | C C14 | -4.3524055                        | 0.0000000 | -3.5907164 |
| 22    | C C15 | -2.1451252                        | 0.0000000 | -2.6677375 |
| 23    | C C16 | -4.0535178                        | 0.0000000 | -1.1825748 |
| 24    | C C17 | -4.8750467                        | 0.0000000 | -2.3186647 |
| 25    | C C18 | -2.9725136                        | 0.0000000 | -3.7673274 |
| 26    | H H7  | -1.0636084                        | 0.0000000 | -2.8299058 |
| 27    | H H14 | -5.9620151                        | 0.0000000 | -2.2005742 |
| 28    | H H15 | -2.5431091                        | 0.0000000 | -4.7753403 |
| 29    | H H16 | -5.0217535                        | 0.0000000 | -4.4581155 |
| 30    | C C19 | 1.8605023                         | 0.0000000 | 0.5717179  |
| 31    | C C20 | 3.0737131                         | 0.0000000 | 0.4452907  |
| 32    | C C21 | 4.4631404                         | 0.0000000 | 0.2731857  |
| 33    | C C22 | 7.2374154                         | 0.0000000 | -0.0938720 |
| 34    | C C23 | 5.3322690                         | 0.0000000 | 1.3750399  |
| 35    | C C24 | 5.0156058                         | 0.0000000 | -1.0157054 |



|    |   |     |           |           |            |
|----|---|-----|-----------|-----------|------------|
| 36 | C | C25 | 6.3802376 | 0.0000000 | -1.1983663 |
| 37 | C | C26 | 6.6982549 | 0.0000000 | 1.1953991  |
| 38 | H | H9  | 4.9095414 | 0.0000000 | 2.3856026  |
| 39 | H | H12 | 4.3449124 | 0.0000000 | -1.8816960 |
| 40 | H | H13 | 6.8048195 | 0.0000000 | -2.2077497 |
| 41 | H | H17 | 7.3695153 | 0.0000000 | 2.0608235  |
| 42 | C | C27 | 8.6403112 | 0.0000000 | -0.2836983 |
| 43 | N | N1  | 9.7920106 | 0.0000000 | -0.4541113 |

E (DFT) =           -1083.12216       VWN  
                      -1092.93870       pBP86

Coordinates for Compound **1g**.

|       |       | Cartesian Coordinates (Angstroms) |            |            |
|-------|-------|-----------------------------------|------------|------------|
| Atom  |       | X                                 | Y          | Z          |
| ----- |       | -----                             | -----      | -----      |
| 1     | H H1  | -4.0968524                        | -3.5003312 | -0.0173063 |
| 2     | C C1  | -4.7886074                        | -2.6421025 | -0.0165897 |
| 3     | C C2  | -6.5517087                        | -0.5335511 | -0.0363184 |
| 4     | C C3  | -4.2773144                        | -1.3226051 | -0.0004412 |
| 5     | C C4  | -6.1359417                        | -2.8866948 | -0.0288369 |
| 6     | C C5  | -7.0314039                        | -1.8287022 | -0.0442231 |
| 7     | C C6  | -5.1832613                        | -0.2615616 | -0.0194876 |
| 8     | H H3  | -6.5030787                        | -3.9141975 | -0.0292709 |
| 9     | H H4  | -8.1148083                        | -2.0046437 | -0.0546747 |
| 10    | H H6  | -7.2761685                        | 0.2873268  | -0.0450399 |
| 11    | C C7  | -2.8504586                        | -1.0534600 | 0.0250918  |
| 12    | C C8  | -0.0729650                        | -0.5437950 | 0.0724385  |
| 13    | C C9  | -1.9195889                        | -2.0961624 | 0.0424448  |
| 14    | C C10 | -2.3623991                        | 0.2639521  | 0.0243434  |
| 15    | C C11 | -0.9879239                        | 0.4966258  | 0.0564116  |
| 16    | C C12 | -0.5731798                        | -1.8682234 | 0.0606397  |
| 17    | H H8  | -2.2702864                        | -3.1333186 | 0.0397025  |
| 18    | H H10 | -0.5833842                        | 1.5161984  | 0.0681035  |
| 19    | H H11 | 0.1346563                         | -2.7028803 | 0.0708879  |
| 20    | C C13 | -3.3000320                        | 1.3659595  | 0.0001811  |
| 21    | C C14 | -5.1148549                        | 3.5112811  | -0.0200283 |
| 22    | C C15 | -2.8611497                        | 2.6952698  | -0.0163989 |
| 23    | C C16 | -4.6906074                        | 1.1114368  | -0.0112162 |
| 24    | C C17 | -5.5697963                        | 2.2058571  | -0.0197166 |
| 25    | C C18 | -3.7412892                        | 3.7474494  | -0.0283724 |
| 26    | H H7  | -1.7941232                        | 2.9203999  | -0.0188102 |
| 27    | H H14 | -6.6499838                        | 2.0373035  | -0.0221044 |
| 28    | H H15 | -3.3632164                        | 4.7639481  | -0.0477067 |

|    |   |     |            |            |            |
|----|---|-----|------------|------------|------------|
| 29 | H | H16 | -5.8262750 | 4.3459722  | -0.0265238 |
| 30 | C | C19 | 1.3231596  | -0.3274806 | 0.0761250  |
| 31 | C | C20 | 2.5413729  | -0.2077439 | 0.0663680  |
| 32 | C | C21 | 3.9465173  | -0.0791257 | 0.0375135  |
| 33 | C | C22 | 6.7743391  | 0.1041982  | -0.0187506 |
| 34 | C | C23 | 4.6948497  | 0.0455062  | 1.2150280  |
| 35 | C | C24 | 4.6527177  | -0.1153753 | -1.1568563 |
| 36 | C | C25 | 6.0237921  | -0.0297969 | -1.1918528 |
| 37 | C | C26 | 6.0630003  | 0.1199951  | 1.2078670  |
| 38 | H | H9  | 4.1663840  | 0.0564479  | 2.1855872  |
| 39 | H | H12 | 4.1030692  | -0.2195991 | -2.0934493 |
| 40 | H | H13 | 6.5297470  | -0.0707051 | -2.1649206 |
| 41 | H | H17 | 6.6024600  | 0.2074788  | 2.1438841  |
| 42 | N | N1  | 8.1424714  | 0.1903733  | -0.0585679 |
| 43 | C | C27 | 8.8794467  | -0.0171439 | 1.1594516  |
| 44 | H | H19 | 8.6134562  | 0.7287200  | 1.9264365  |
| 45 | H | H20 | 8.7189437  | -1.0295695 | 1.5908939  |
| 46 | H | H21 | 9.9490638  | 0.1050378  | 0.9608313  |
| 47 | C | C28 | 8.8166958  | -0.0897427 | -1.2963487 |
| 48 | H | H18 | 9.8984434  | 0.0601083  | -1.1635834 |
| 49 | H | H22 | 8.6494460  | -1.1476612 | -1.6457306 |
| 50 | H | H23 | 8.4840579  | 0.5902048  | -2.0941324 |

E (DFT) =           -1124.44462       VWN  
                          -1134.66136       pBP86

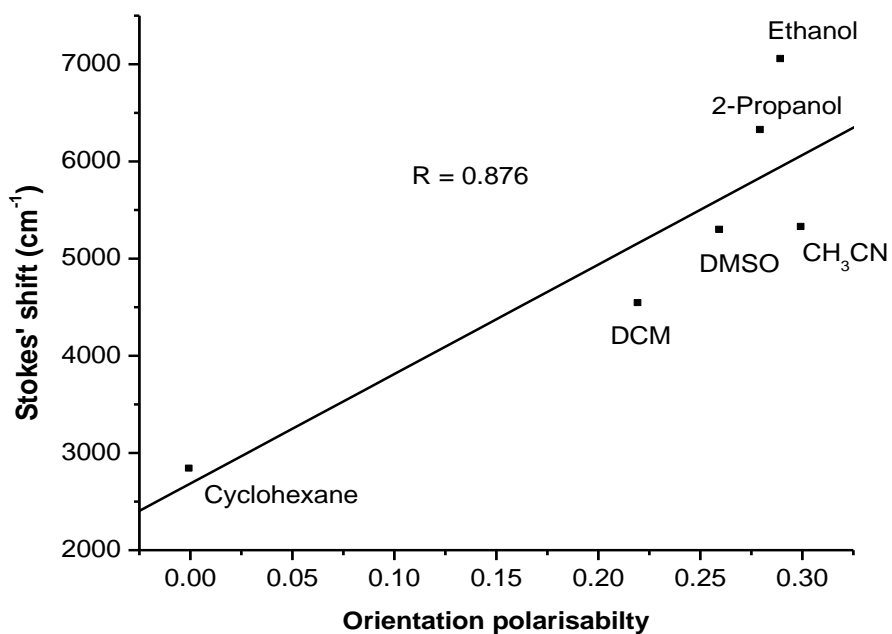

**Figure 34:** Lippert-Mataga plot for **1d**.

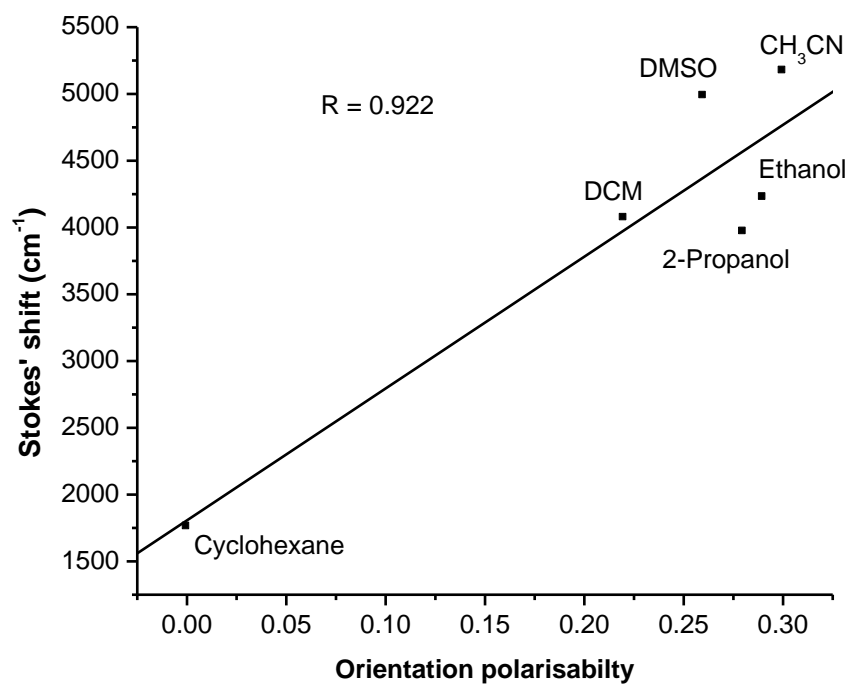

**Figure 35:** Lippert-Mataga plot for **1f**.

## References

1. Lakowicz J. R.; *Principles of Fluorescence Spectroscopy*, 2nd ed.; Kulwer Academic: New York, 1999; pp 52–54.
